# Supplementary material for: Population Genomics of Megalobrama Provides Insights into Evolutionary History and Dietary Adaptation
Source: MDPI journal article supplement (doi:10.3390/biology11020186), 2022-01-25
Supplement: s1 [file s1]

# Population Genomics of *Megalobrama* Provides Insights into Evolutionary History and Dietary Adaptation

Jing Chen <sup>1,2</sup>, Han Liu <sup>1,2,\*</sup>, Ravi Gooneratne <sup>3</sup>, Yao Wang <sup>1,2</sup>, and Weimin Wang <sup>1,2,\*</sup>

<sup>1</sup> Key Lab of Agricultural Animal Genetics, Breeding and Reproduction of Ministry of Education, College of Fisheries, Huazhong Agricultural University, Wuhan 430070, China; cjing24511@163.com (J.C.); othnielartorius@gmail.com (Y.W.)  
<sup>2</sup> Key Lab of Freshwater Animal Breeding, Ministry of Agriculture and Rural Affairs, College of Fisheries, Huazhong Agricultural University, Wuhan 430070, China;  
<sup>3</sup> Faculty of Agriculture and Life Sciences, Lincoln University, Lincoln 7647, New Zealand; ravi.gooneratne@lincoln.ac.nz  
\* Correspondence: liuhan@mail.hzau.edu.cn (H.L.); wangwm@mail.hzau.edu.cn (W.W.)

## Supplementary figures

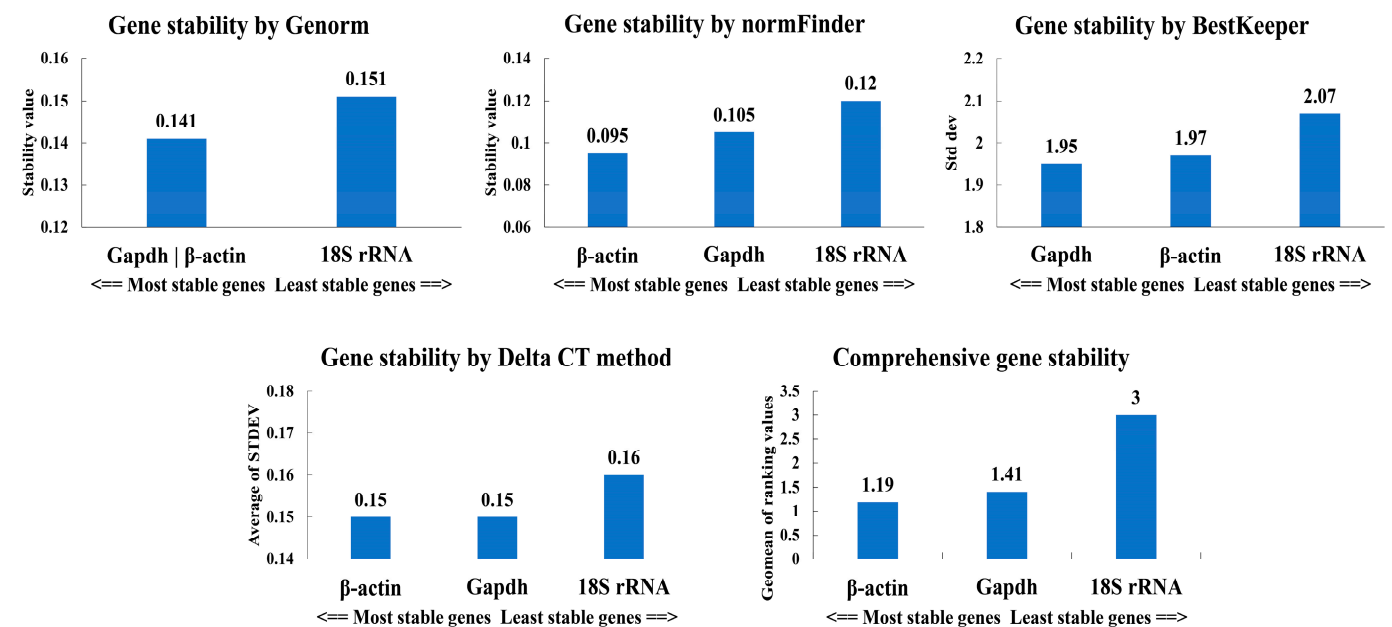

Figure S1. Detection of stability of reference genes (  $\beta$ -actin, Gapdh, and 18S rRNA).

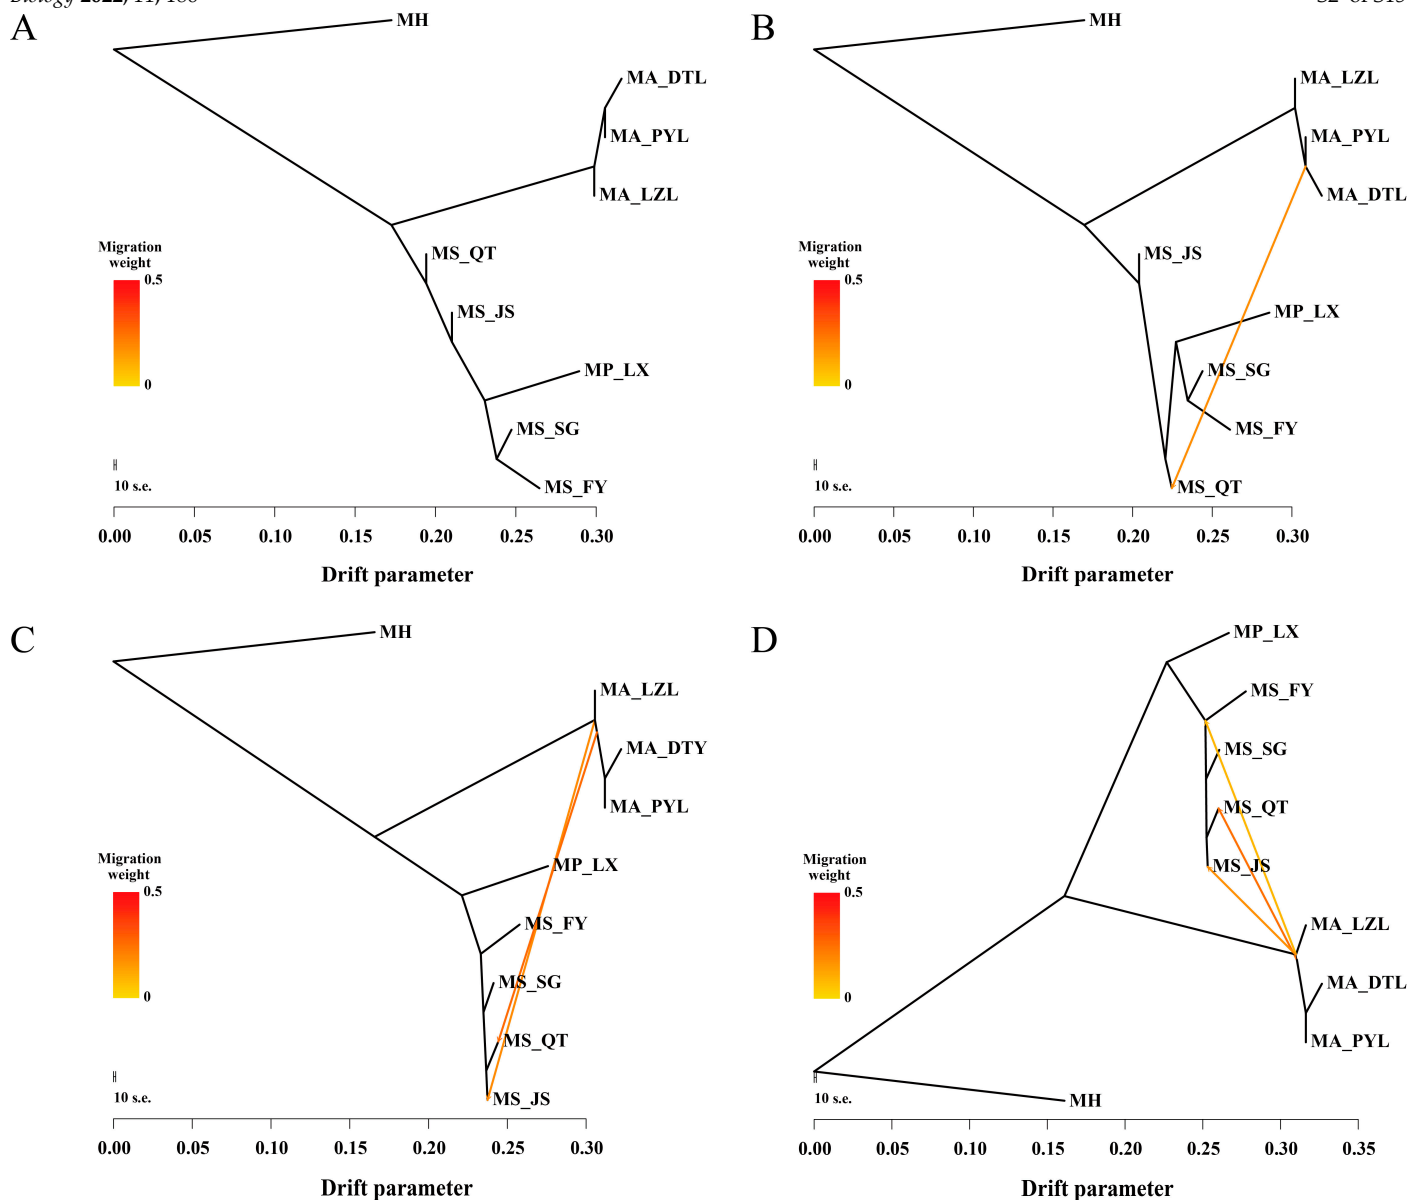

**Figure S2. Gene flow analysis among different geographical *Megalobrama* populations.** A-D represents that there are 0, 1, 2, and 3 migration events between the population. Arrows indicate gene infiltration or migration events that occur between populations. The heat map indicates the weight of gene infiltration, the red color indicates the greater the weight, each branch represents a population, and the length of the horizontal branch refers to each branch. The percentage of genetic drift that has occurred and the bottom axis represents drift parameters. DTY represents DTL, TEL, and YNL populations. MP, MS, MA, and MH refer to *M. pellegrini*, *M. skolkovii*, *M. amblycephala* and *M. hoffmanni*, respectively.

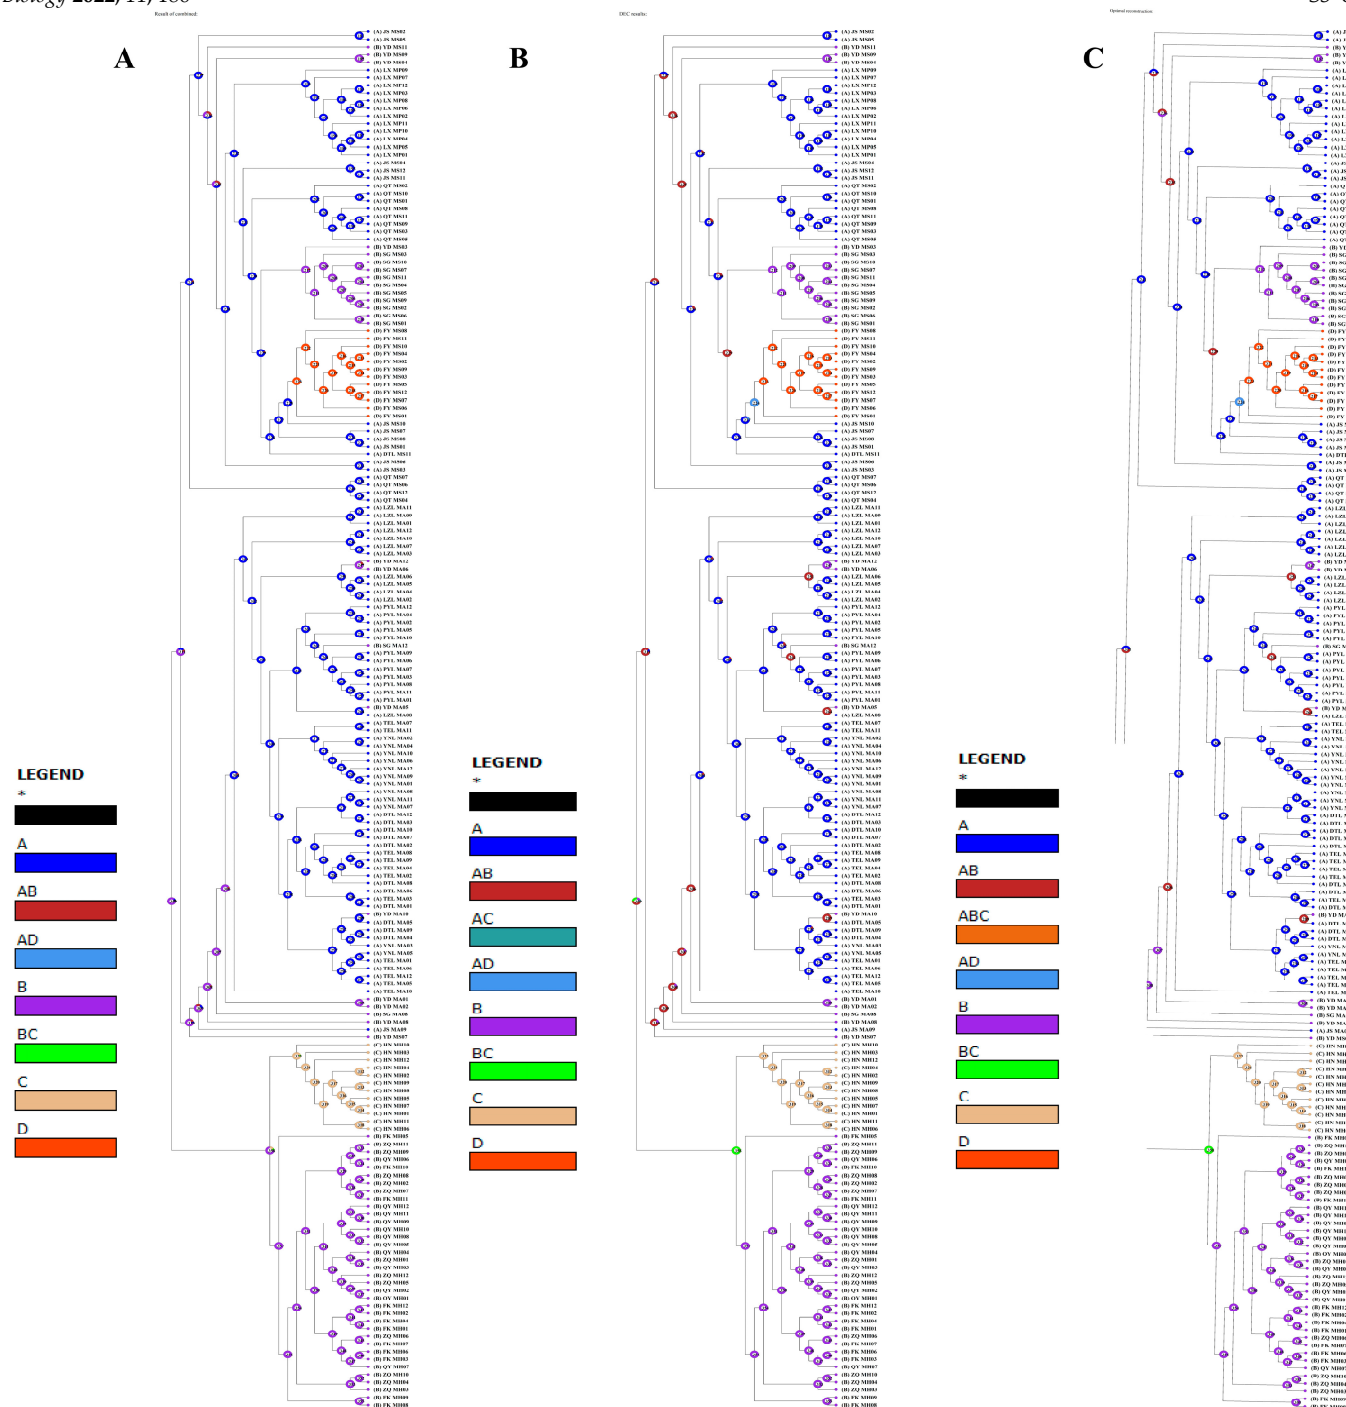

**Figure S3.** Ancestral area reconstruction based on BBM model (A), DEC model (B), and S-DIVA model (C) with RASP. The letter A represents the Yangtze River, the letter B represents the Pearl River, the letter C represents the Hainan Island, and the letter D represents the Heilongjiang and Wusuli River. MP, MS, MA, and MH refer to *M. pellegrini*, *M. skolkovii*, *M. amblycephala* and *M. hoffmanni*, respectively.

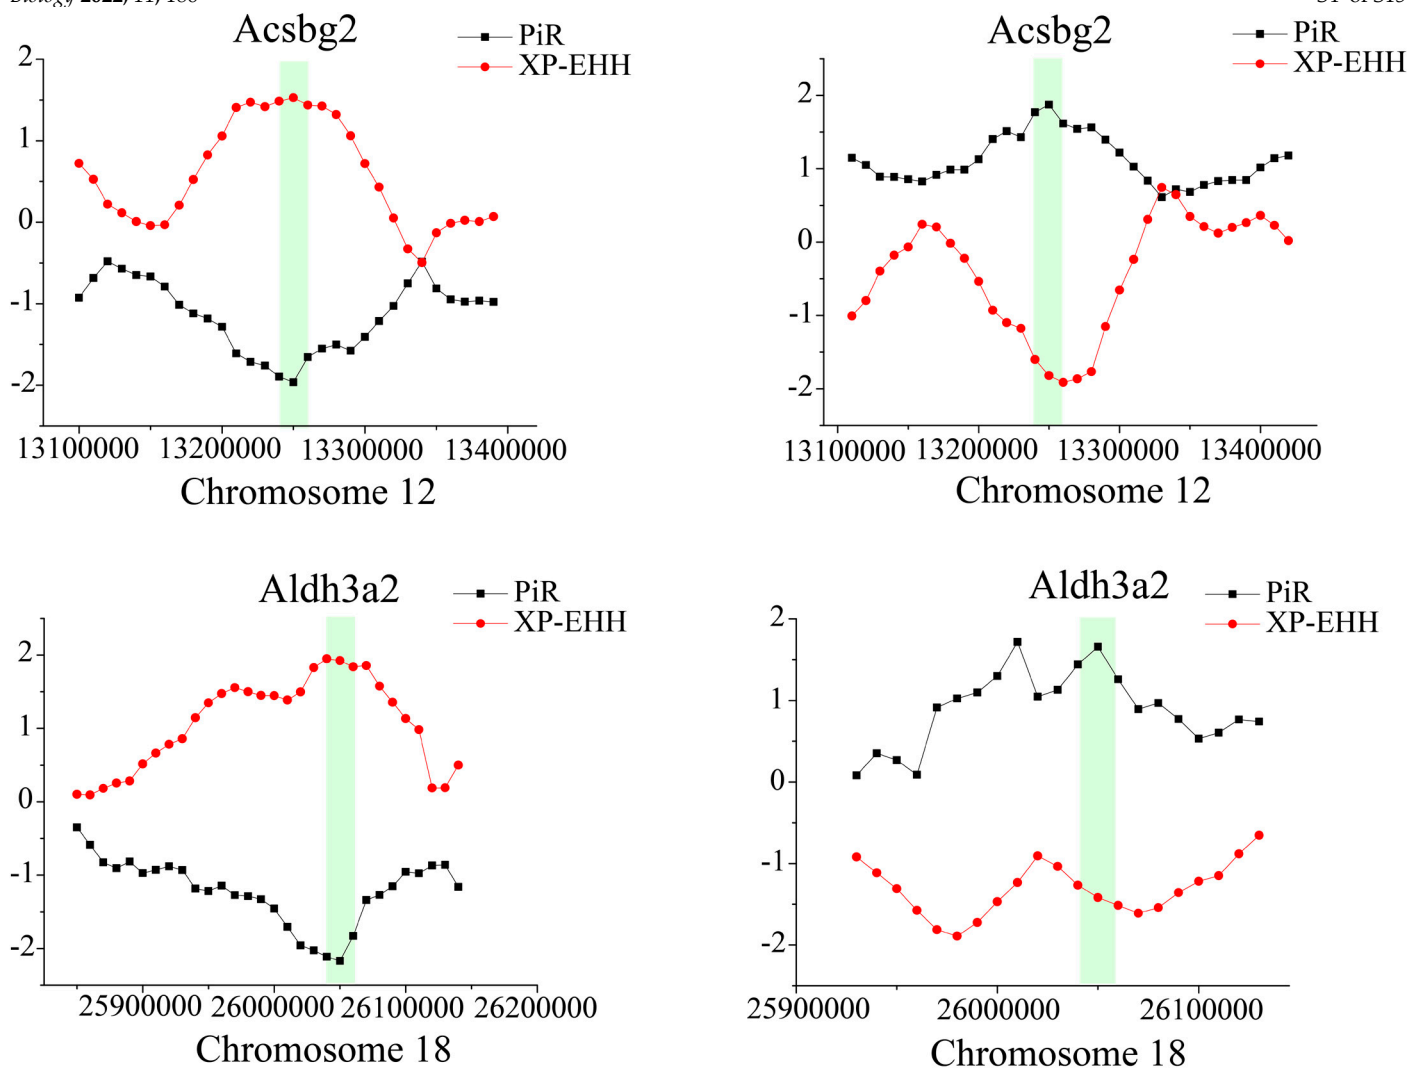

**Figure S4. Genome-wide detection of selection sweeps on chromosomes during the diet adaptation of *M. amblycephala*.** *Acsbg2* gene was identified from the comparisons between *M. amblycephala* and *M. hoffmanni* (or *M. skolkovii*), *Aldh3a2* gene was identified from the comparisons between *M. amblycephala* and *M. hoffmanni* (or *M. pellegrini*). The black curve indicates the nucleotide polymorphism ratio (PiR) analysis, and red curve indicates extended haplotype homozygosity between populations (XP-EHH) analysis.

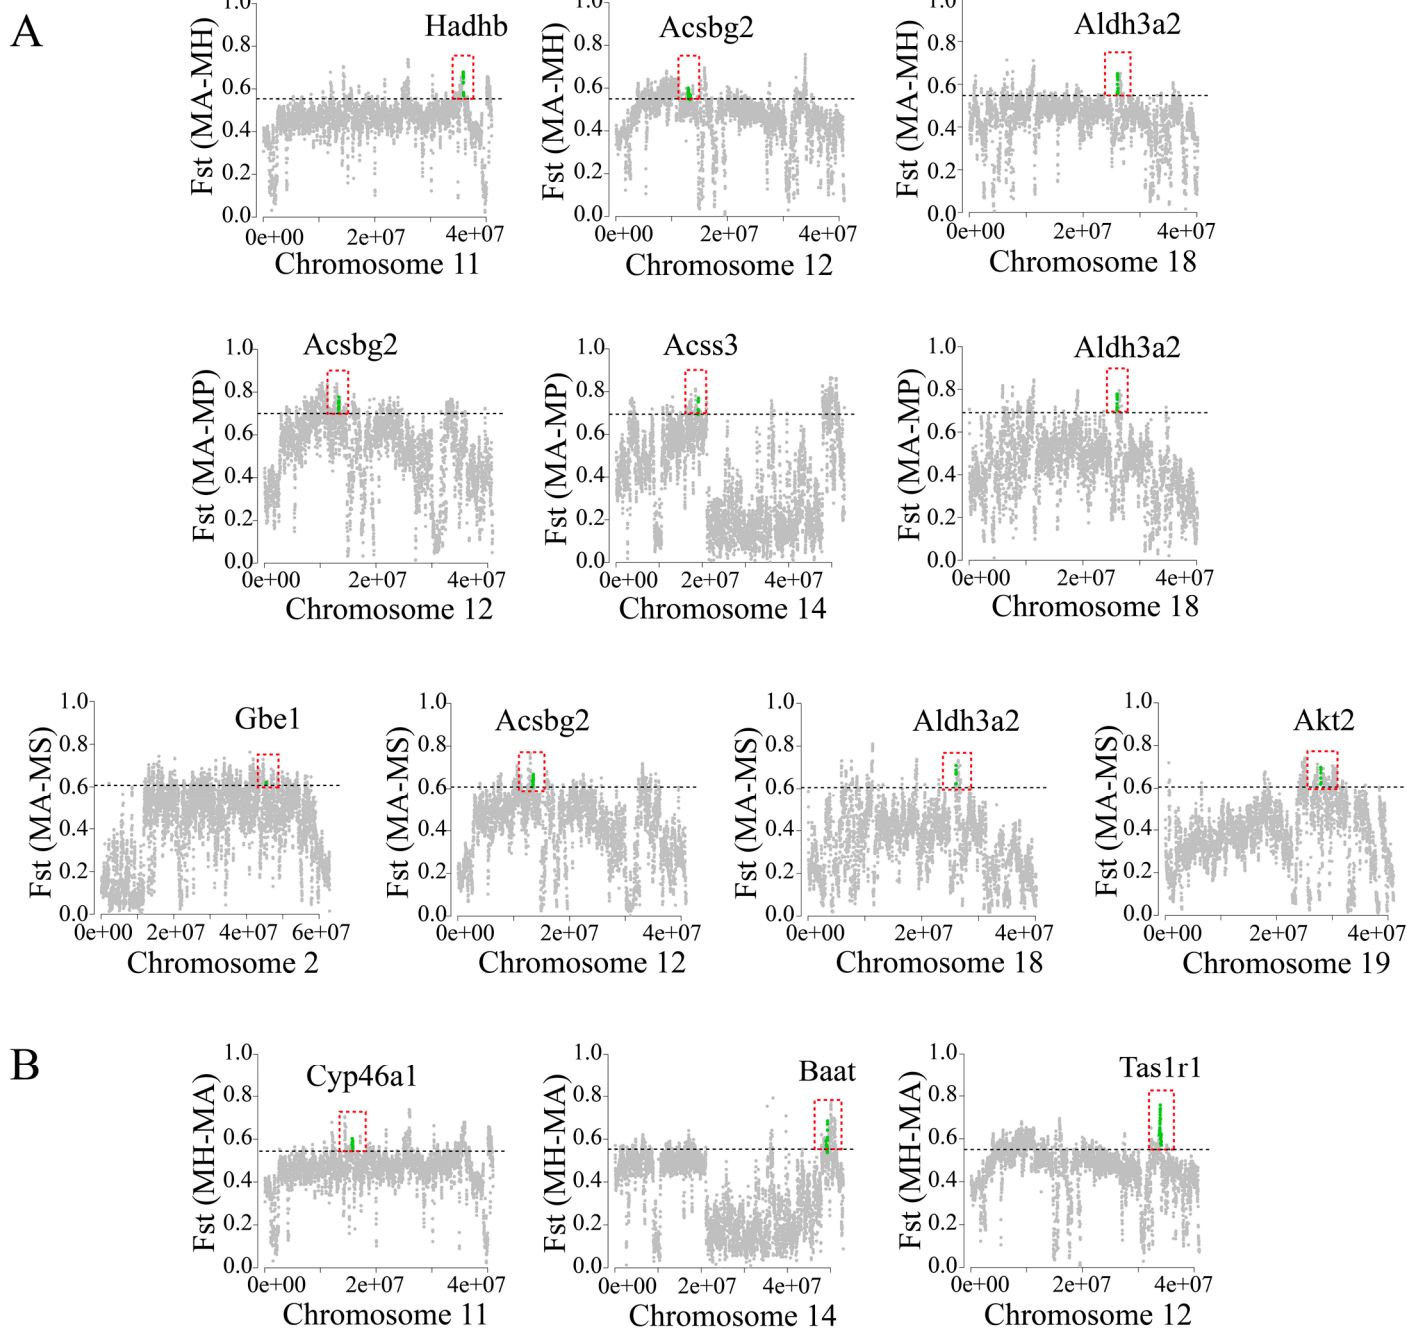

**Figure S5. Genome-wide screening for *M. amblycephala* (A) and *M. hoffmanni* (B) diet-associated selective sweeps estimating differentiation index (Fst). The green dots represent the position of representative candidate genes on chromosomes. The black horizontal dashed line in Manhattan plots showed the significance threshold of the top 5% Fst. MP, MS, MA, and MH refer to *M. pellegrini*, *M. skolkovii*, *M. amblycephala* and *M. hoffmanni*, respectively.**

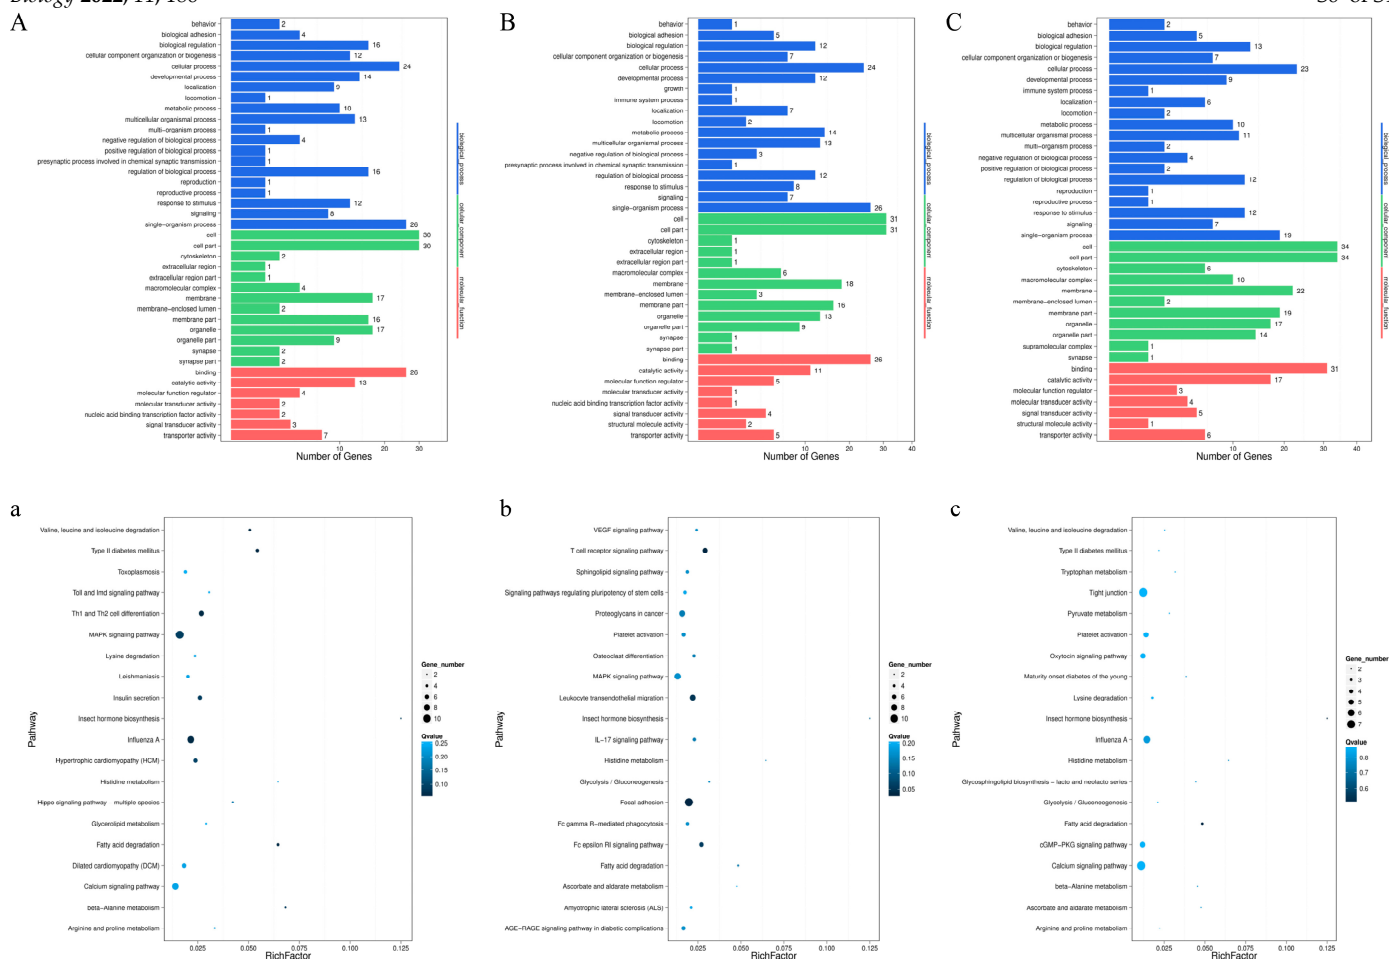

**Figure S6.** Gene Ontology (GO) analysis of candidate genes of *M. amblycephala* in MA-MH (A), MA-MS (B) and MA-MP (C) groups, and Kyoto Encyclopedia of Genes and Genomes (KEGG) analysis of these genes screened from MA-MH (a), MA-MS (b) and MA-MP (c) groups. MP, MS, MA, and MH refer to *M. pellegrini*, *M. skolkovii*, *M. amblycephala* and *M. hoffmanni*, respectively.

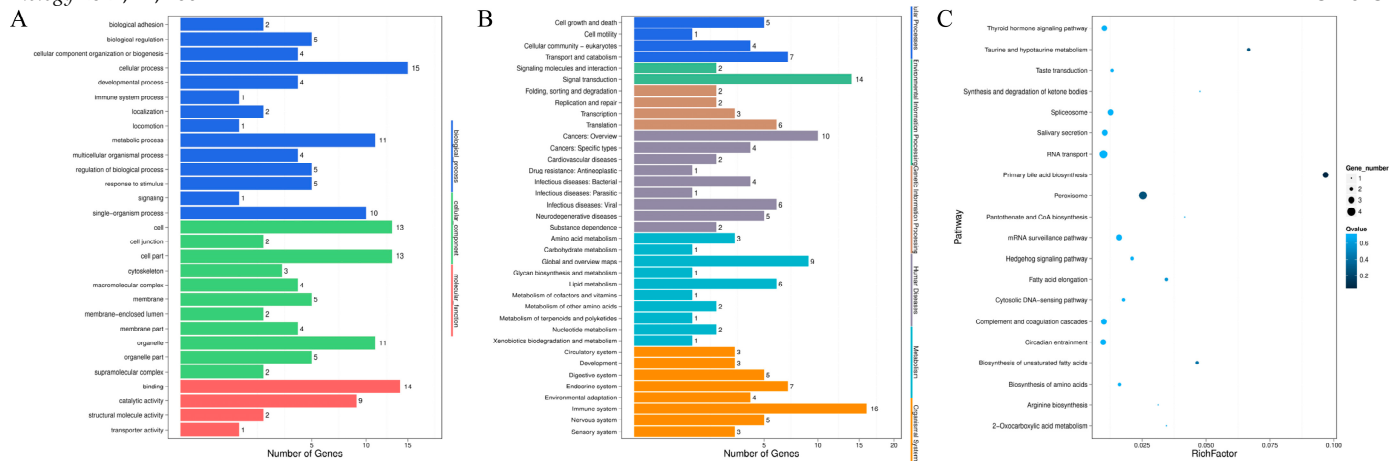

**Figure S7.** Gene Ontology (GO) (A) and Kyoto Encyclopedia of Genes and Genomes (KEGG) (B and C) analyses of candidate genes in *M. hoffmanni* screened by selective sweeps inferring from the comparison between *M. hoffmanni* and *M. amblycephala*.

## Supplementary tables

Table S1. Mapping statistics of samples in whole genome resequencing.

| Sample ID | Total reads(M) | Mapped reads(M) | Total bases(G) | Mapped bases(G) | Mapping rate (%) | Pair mapping rate (%) | Coverage rate at-least 1X (%) | Coverage rate at-least 5X (%) | Coverage rate at-least 9X (%) | Effective depth(X) |
|-----------|----------------|-----------------|----------------|-----------------|------------------|-----------------------|-------------------------------|-------------------------------|-------------------------------|--------------------|
| DTL_MA01  | 117.29         | 117.06          | 17.59          | 17.39           | 99.80            | 96.35                 | 96.22                         | 92.19                         | 84.42                         | 15.70              |
| DTL_MA02  | 131.79         | 131.50          | 19.77          | 19.52           | 99.78            | 96.26                 | 96.24                         | 92.82                         | 87.33                         | 17.62              |
| DTL_MA03  | 153.85         | 153.52          | 23.08          | 22.81           | 99.79            | 96.61                 | 96.38                         | 93.59                         | 89.86                         | 20.59              |
| DTL_MA04  | 133.50         | 133.20          | 20.03          | 19.79           | 99.77            | 96.58                 | 95.94                         | 92.57                         | 87.13                         | 17.86              |
| DTL_MA05  | 151.56         | 151.26          | 22.73          | 22.48           | 99.80            | 96.49                 | 96.37                         | 93.68                         | 89.73                         | 20.29              |
| DTL_MA06  | 148.26         | 147.98          | 22.24          | 22.00           | 99.81            | 96.73                 | 96.30                         | 93.56                         | 89.48                         | 19.85              |
| DTL_MA07  | 136.62         | 136.37          | 20.49          | 20.28           | 99.81            | 96.51                 | 96.20                         | 93.11                         | 87.95                         | 18.30              |
| DTL_MA08  | 145.28         | 144.98          | 21.79          | 21.54           | 99.79            | 96.24                 | 96.19                         | 93.16                         | 88.82                         | 19.44              |
| DTL_MA09  | 119.37         | 119.15          | 17.91          | 17.71           | 99.82            | 96.41                 | 96.01                         | 92.28                         | 84.79                         | 15.99              |
| DTL_MA10  | 160.30         | 159.96          | 24.05          | 23.76           | 99.79            | 96.47                 | 96.46                         | 93.83                         | 90.40                         | 21.45              |
| DTL_MS11  | 141.29         | 140.81          | 21.19          | 20.61           | 99.66            | 91.50                 | 93.78                         | 88.12                         | 82.45                         | 18.60              |
| DTL_MA12  | 138.74         | 138.41          | 20.81          | 20.57           | 99.76            | 96.72                 | 96.28                         | 93.16                         | 88.30                         | 18.56              |
| FK_MH01   | 124.20         | 123.56          | 18.63          | 17.79           | 99.49            | 87.90                 | 91.05                         | 81.82                         | 74.15                         | 16.06              |
| FK_MH02   | 127.40         | 126.85          | 19.11          | 18.25           | 99.57            | 87.77                 | 90.10                         | 81.69                         | 74.09                         | 16.48              |
| FK_MH03   | 106.38         | 105.85          | 15.96          | 15.23           | 99.51            | 86.88                 | 89.83                         | 80.25                         | 69.95                         | 13.75              |
| FK_MH04   | 132.96         | 132.33          | 19.94          | 19.04           | 99.52            | 87.99                 | 90.44                         | 82.38                         | 75.58                         | 17.18              |
| FK_MH05   | 123.63         | 122.88          | 18.54          | 17.68           | 99.40            | 87.51                 | 90.17                         | 81.60                         | 73.90                         | 15.96              |
| FK_MH06   | 101.12         | 100.62          | 15.17          | 14.49           | 99.51            | 86.86                 | 89.61                         | 79.38                         | 67.98                         | 13.07              |
| FK_MH07   | 129.66         | 126.01          | 19.45          | 17.92           | 97.19            | 85.31                 | 90.28                         | 81.75                         | 74.29                         | 16.17              |
| FK_MH08   | 124.20         | 123.58          | 18.63          | 17.79           | 99.50            | 86.87                 | 90.37                         | 81.81                         | 74.27                         | 16.06              |
| FK_MH09   | 127.73         | 127.09          | 19.16          | 18.30           | 99.49            | 86.81                 | 90.48                         | 82.06                         | 74.80                         | 16.51              |
| FK_MH10   | 146.55         | 145.82          | 21.98          | 20.98           | 99.50            | 87.49                 | 90.76                         | 83.15                         | 77.11                         | 18.94              |
| FK_MH11   | 111.77         | 111.11          | 16.77          | 16.00           | 99.41            | 86.55                 | 90.16                         | 80.92                         | 71.68                         | 14.44              |
| FK_MH12   | 157.31         | 156.59          | 23.60          | 22.54           | 99.54            | 87.72                 | 90.91                         | 83.51                         | 78.14                         | 20.34              |
| FY_MS01   | 116.84         | 116.42          | 17.53          | 17.06           | 99.64            | 92.32                 | 92.86                         | 86.36                         | 78.10                         | 15.40              |
| FY_MS02   | 121.22         | 120.37          | 18.18          | 17.62           | 99.30            | 91.31                 | 93.04                         | 86.37                         | 78.66                         | 15.90              |
| FY_MS03   | 132.46         | 131.82          | 19.87          | 19.28           | 99.52            | 91.96                 | 93.34                         | 87.39                         | 80.93                         | 17.40              |
| FY_MS04   | 125.72         | 124.33          | 18.86          | 18.15           | 98.90            | 91.10                 | 93.67                         | 87.03                         | 79.73                         | 16.39              |
| FY_MS05   | 138.54         | 137.16          | 20.78          | 20.08           | 99.00            | 91.13                 | 93.09                         | 87.49                         | 81.75                         | 18.12              |
| FY_MS06   | 148.13         | 147.43          | 22.22          | 21.57           | 99.53            | 91.85                 | 93.22                         | 87.96                         | 82.84                         | 19.47              |
| FY_MS07   | 140.74         | 139.97          | 21.11          | 20.49           | 99.46            | 91.63                 | 93.47                         | 87.76                         | 82.14                         | 18.49              |
| FY_MS08   | 154.72         | 153.84          | 23.21          | 22.54           | 99.43            | 91.11                 | 93.48                         | 88.55                         | 83.92                         | 20.34              |
| FY_MS09   | 152.13         | 151.25          | 22.82          | 22.13           | 99.42            | 91.52                 | 93.54                         | 88.35                         | 83.54                         | 19.98              |
| FY_MS10   | 154.49         | 153.97          | 23.17          | 22.56           | 99.66            | 91.51                 | 93.26                         | 88.26                         | 83.68                         | 20.36              |
| FY_MS11   | 147.19         | 146.59          | 22.08          | 21.48           | 99.59            | 91.41                 | 93.35                         | 88.12                         | 83.02                         | 19.39              |
| FY_MS12   | 117.97         | 117.10          | 17.70          | 17.14           | 99.26            | 90.81                 | 93.11                         | 86.71                         | 78.78                         | 15.47              |
| HN_MH01   | 145.67         | 144.98          | 21.85          | 20.90           | 99.52            | 87.37                 | 89.77                         | 82.31                         | 76.66                         | 18.86              |
| HN_MH02   | 132.16         | 131.38          | 19.82          | 18.91           | 99.41            | 86.87                 | 89.78                         | 81.72                         | 75.12                         | 17.07              |
| HN_MH03   | 119.43         | 118.85          | 17.91          | 17.12           | 99.52            | 86.95                 | 89.54                         | 80.79                         | 73.12                         | 15.45              |
| HN_MH04   | 123.67         | 123.08          | 18.55          | 17.72           | 99.52            | 87.29                 | 89.51                         | 81.01                         | 73.82                         | 16.00              |
| HN_MH05   | 128.50         | 127.91          | 19.27          | 18.42           | 99.54            | 87.23                 | 89.68                         | 81.36                         | 74.62                         | 16.63              |
| HN_MH06   | 116.65         | 116.07          | 17.50          | 16.72           | 99.50            | 86.98                 | 89.36                         | 80.49                         | 72.50                         | 15.09              |
| HN_MH07   | 134.12         | 133.44          | 20.12          | 19.22           | 99.49            | 87.14                 | 89.72                         | 81.59                         | 75.28                         | 17.35              |
| HN_MH08   | 124.22         | 123.42          | 18.63          | 17.77           | 99.36            | 86.92                 | 89.48                         | 80.99                         | 73.75                         | 16.04              |
| HN_MH09   | 132.18         | 131.53          | 19.83          | 18.95           | 99.51            | 87.05                 | 89.78                         | 81.52                         | 74.78                         | 17.10              |
| HN_MH10   | 126.82         | 126.08          | 19.02          | 18.17           | 99.41            | 86.99                 | 89.54                         | 81.06                         | 73.92                         | 16.40              |
| HN_MH11   | 108.91         | 108.01          | 16.34          | 15.52           | 99.17            | 85.82                 | 89.28                         | 79.91                         | 70.80                         | 14.01              |
| HN_MH12   | 142.85         | 141.70          | 21.43          | 20.40           | 99.20            | 87.28                 | 89.85                         | 82.03                         | 76.19                         | 18.41              |
| JS_MS01   | 110.89         | 110.50          | 16.63          | 16.17           | 99.64            | 92.14                 | 93.12                         | 85.90                         | 75.92                         | 14.59              |
| JS_MS02   | 136.55         | 136.13          | 20.48          | 20.05           | 99.69            | 94.07                 | 96.48                         | 92.56                         | 85.77                         | 18.10              |
| JS_MS03   | 136.93         | 136.51          | 20.54          | 20.06           | 99.69            | 93.31                 | 95.23                         | 90.51                         | 84.08                         | 18.10              |

|          |        |        |       |       |       |       |       |       |       |       |
|----------|--------|--------|-------|-------|-------|-------|-------|-------|-------|-------|
| JS_MS04  | 136.64 | 136.21 | 20.50 | 20.00 | 99.68 | 93.10 | 94.86 | 89.92 | 83.43 | 18.05 |
| JS_MS05  | 124.26 | 123.91 | 18.64 | 18.25 | 99.72 | 94.01 | 96.16 | 91.60 | 83.21 | 16.47 |
| JS_MS06  | 140.55 | 140.11 | 21.08 | 20.62 | 99.69 | 93.78 | 96.21 | 92.24 | 85.99 | 18.61 |
| JS_MS07  | 125.31 | 124.89 | 18.80 | 18.27 | 99.66 | 91.82 | 93.28 | 86.93 | 79.73 | 16.49 |
| JS_MS08  | 139.23 | 138.71 | 20.88 | 20.28 | 99.62 | 92.05 | 93.46 | 87.75 | 81.90 | 18.30 |
| JS_MA09  | 164.82 | 164.38 | 24.72 | 24.29 | 99.74 | 95.31 | 96.70 | 93.76 | 89.59 | 21.92 |
| JS_MS10  | 111.11 | 110.71 | 16.67 | 16.22 | 99.65 | 92.17 | 94.19 | 87.24 | 76.81 | 14.64 |
| JS_MS11  | 119.27 | 118.75 | 17.89 | 17.37 | 99.56 | 91.59 | 93.34 | 86.75 | 78.72 | 15.68 |
| JS_MS12  | 140.01 | 139.58 | 21.00 | 20.50 | 99.70 | 93.68 | 95.34 | 90.67 | 84.23 | 18.50 |
| LX_MP01  | 126.88 | 126.37 | 19.03 | 18.48 | 99.60 | 90.02 | 92.59 | 86.26 | 79.50 | 16.68 |
| LX_MP02  | 115.69 | 115.28 | 17.35 | 16.84 | 99.65 | 91.85 | 92.37 | 85.28 | 76.72 | 15.20 |
| LX_MP03  | 108.35 | 107.91 | 16.25 | 15.77 | 99.60 | 91.03 | 92.10 | 84.65 | 75.01 | 14.23 |
| LX_MP04  | 105.19 | 104.70 | 15.78 | 15.30 | 99.53 | 90.73 | 92.17 | 84.42 | 74.01 | 13.81 |
| LX_MP05  | 106.09 | 105.66 | 15.91 | 15.43 | 99.60 | 90.69 | 92.16 | 84.48 | 74.33 | 13.92 |
| LX_MP06  | 104.89 | 104.48 | 15.73 | 15.26 | 99.61 | 90.82 | 92.02 | 84.44 | 73.93 | 13.78 |
| LX_MP07  | 103.56 | 103.17 | 15.53 | 15.07 | 99.63 | 91.06 | 91.98 | 84.12 | 73.38 | 13.61 |
| LX_MP08  | 115.69 | 115.26 | 17.35 | 16.85 | 99.63 | 91.13 | 92.42 | 85.32 | 76.80 | 15.20 |
| LX_MP09  | 113.62 | 113.18 | 17.04 | 16.53 | 99.62 | 91.06 | 92.37 | 85.26 | 76.61 | 14.92 |
| LX_MP10  | 117.12 | 116.68 | 17.57 | 17.05 | 99.62 | 90.91 | 92.24 | 85.33 | 77.19 | 15.38 |
| LX_MP11  | 122.85 | 122.31 | 18.43 | 17.87 | 99.56 | 91.49 | 93.23 | 85.90 | 78.58 | 16.13 |
| LX_MP12  | 141.55 | 141.00 | 21.23 | 20.60 | 99.61 | 91.23 | 93.53 | 86.98 | 81.37 | 18.60 |
| LZL_MA01 | 138.43 | 138.10 | 20.76 | 20.51 | 99.76 | 96.21 | 96.61 | 93.28 | 87.99 | 18.51 |
| LZL_MA02 | 130.11 | 129.85 | 19.52 | 19.31 | 99.80 | 96.45 | 96.24 | 92.72 | 86.82 | 17.43 |
| LZL_MA03 | 153.63 | 153.32 | 23.05 | 22.76 | 99.80 | 96.05 | 96.49 | 93.43 | 89.17 | 20.54 |
| LZL_MA04 | 146.92 | 146.62 | 22.04 | 21.80 | 99.79 | 96.29 | 96.24 | 93.19 | 88.92 | 19.67 |
| LZL_MA05 | 134.75 | 134.49 | 20.21 | 19.99 | 99.80 | 96.32 | 96.39 | 93.13 | 87.65 | 18.04 |
| LZL_MA06 | 160.02 | 159.72 | 24.00 | 23.74 | 99.81 | 96.39 | 96.64 | 93.84 | 90.20 | 21.42 |
| LZL_MA07 | 117.47 | 117.22 | 17.62 | 17.40 | 99.78 | 95.81 | 96.54 | 92.29 | 83.76 | 15.71 |
| LZL_MA08 | 157.34 | 156.92 | 23.60 | 23.31 | 99.73 | 96.43 | 96.83 | 93.96 | 90.19 | 21.04 |
| LZL_MA09 | 128.48 | 128.22 | 19.27 | 19.04 | 99.79 | 95.98 | 96.13 | 92.41 | 86.21 | 17.19 |
| LZL_MA10 | 105.81 | 105.55 | 15.87 | 15.68 | 99.75 | 96.18 | 96.39 | 91.30 | 80.16 | 14.15 |
| LZL_MA11 | 131.56 | 131.27 | 19.73 | 19.50 | 99.78 | 96.27 | 96.33 | 92.77 | 86.90 | 17.60 |
| LZL_MA12 | 103.87 | 103.65 | 15.58 | 15.40 | 99.79 | 96.35 | 95.95 | 90.76 | 79.19 | 13.90 |
| PYL_MA01 | 105.74 | 105.52 | 15.86 | 15.68 | 99.79 | 96.68 | 95.56 | 90.81 | 80.39 | 14.15 |
| PYL_MA02 | 102.85 | 102.60 | 15.43 | 15.23 | 99.76 | 96.34 | 95.97 | 90.69 | 78.79 | 13.74 |
| PYL_MA03 | 100.39 | 100.14 | 15.06 | 14.85 | 99.75 | 96.24 | 95.90 | 90.27 | 77.35 | 13.41 |
| PYL_MA04 | 104.79 | 104.56 | 15.72 | 15.53 | 99.78 | 96.48 | 95.98 | 91.12 | 79.99 | 14.01 |
| PYL_MA05 | 109.01 | 108.76 | 16.35 | 16.15 | 99.78 | 96.70 | 95.85 | 91.17 | 81.27 | 14.58 |
| PYL_MA06 | 106.30 | 106.07 | 15.95 | 15.75 | 99.78 | 96.47 | 95.94 | 90.96 | 80.08 | 14.21 |
| PYL_MA07 | 130.93 | 130.63 | 19.64 | 19.40 | 99.77 | 96.35 | 96.12 | 92.77 | 87.05 | 17.51 |
| PYL_MA08 | 145.47 | 145.17 | 21.82 | 21.56 | 99.80 | 96.64 | 96.27 | 93.33 | 88.90 | 19.46 |
| PYL_MA09 | 137.75 | 137.44 | 20.66 | 20.42 | 99.77 | 96.39 | 96.29 | 93.23 | 88.10 | 18.43 |
| PYL_MA10 | 125.77 | 125.47 | 18.87 | 18.64 | 99.76 | 96.30 | 96.16 | 92.65 | 86.20 | 16.82 |
| PYL_MA11 | 107.23 | 106.99 | 16.08 | 15.88 | 99.78 | 96.08 | 95.83 | 91.38 | 81.33 | 14.34 |
| PYL_MA12 | 127.11 | 126.86 | 19.07 | 18.85 | 99.81 | 96.51 | 96.31 | 92.92 | 86.64 | 17.01 |
| QT_MS01  | 127.79 | 127.40 | 19.17 | 18.68 | 99.69 | 92.68 | 94.49 | 88.27 | 81.04 | 16.86 |
| QT_MS02  | 116.75 | 116.38 | 17.51 | 17.06 | 99.69 | 92.42 | 94.31 | 87.64 | 78.81 | 15.40 |
| QT_MS03  | 114.56 | 114.22 | 17.18 | 16.79 | 99.70 | 92.97 | 95.17 | 88.92 | 79.44 | 15.15 |
| QT_MS04  | 115.38 | 115.08 | 17.31 | 16.96 | 99.74 | 94.15 | 95.36 | 90.25 | 80.97 | 15.31 |
| QT_MS05  | 145.78 | 145.35 | 21.87 | 21.31 | 99.70 | 92.72 | 94.72 | 89.49 | 83.97 | 19.23 |
| QT_MS06  | 106.84 | 106.52 | 16.03 | 15.69 | 99.70 | 93.29 | 95.77 | 89.89 | 78.42 | 14.16 |
| QT_MS07  | 123.18 | 122.84 | 18.48 | 18.09 | 99.72 | 93.74 | 95.31 | 90.11 | 82.31 | 16.32 |
| QT_MS08  | 115.32 | 114.99 | 17.30 | 16.89 | 99.71 | 92.71 | 94.73 | 88.60 | 78.80 | 15.25 |
| QT_MS09  | 114.63 | 114.29 | 17.19 | 16.77 | 99.70 | 92.54 | 94.43 | 87.86 | 78.24 | 15.14 |
| QT_MS10  | 124.60 | 124.23 | 18.69 | 18.21 | 99.71 | 92.57 | 94.14 | 87.90 | 79.79 | 16.43 |
| QT_MS11  | 105.75 | 105.44 | 15.86 | 15.48 | 99.70 | 92.41 | 94.33 | 87.53 | 76.13 | 13.97 |
| QT_MS12  | 131.85 | 131.53 | 19.78 | 19.37 | 99.76 | 94.38 | 95.69 | 91.41 | 84.55 | 17.49 |
| QY_MH01  | 114.47 | 113.93 | 17.17 | 16.40 | 99.53 | 87.28 | 90.03 | 81.08 | 72.29 | 14.80 |
| QY_MH02  | 105.45 | 104.97 | 15.82 | 15.11 | 99.55 | 87.29 | 89.66 | 80.10 | 69.66 | 13.63 |
| QY_MH03  | 104.64 | 104.15 | 15.70 | 14.99 | 99.53 | 87.01 | 89.70 | 80.07 | 69.50 | 13.53 |
| QY_MH04  | 127.26 | 126.69 | 19.09 | 18.24 | 99.55 | 87.26 | 90.17 | 81.89 | 74.67 | 16.46 |

|          |        |        |       |       |       |       |       |       |       |       |
|----------|--------|--------|-------|-------|-------|-------|-------|-------|-------|-------|
| QY_MH05  | 116.76 | 116.22 | 17.51 | 16.73 | 99.54 | 87.30 | 90.01 | 81.20 | 72.77 | 15.10 |
| QY_MH06  | 133.93 | 133.28 | 20.09 | 19.20 | 99.52 | 86.46 | 90.83 | 82.69 | 76.05 | 17.33 |
| QY_MH07  | 115.01 | 114.49 | 17.25 | 16.50 | 99.54 | 86.68 | 90.40 | 81.27 | 72.62 | 14.89 |
| QY_MH08  | 116.45 | 115.88 | 17.47 | 16.70 | 99.51 | 86.11 | 90.47 | 81.43 | 73.07 | 15.07 |
| QY_MH09  | 126.13 | 125.50 | 18.92 | 18.08 | 99.50 | 86.66 | 90.61 | 82.11 | 74.93 | 16.32 |
| QY_MH10  | 125.32 | 124.74 | 18.80 | 17.98 | 99.54 | 86.89 | 90.52 | 81.88 | 74.54 | 16.22 |
| QY_MH11  | 105.30 | 104.78 | 15.80 | 15.10 | 99.50 | 86.84 | 89.68 | 80.12 | 69.77 | 13.63 |
| QY_MH12  | 128.81 | 128.23 | 19.32 | 18.49 | 99.55 | 86.85 | 90.30 | 82.13 | 75.11 | 16.69 |
| SG_MS01  | 141.82 | 141.32 | 21.27 | 20.66 | 99.65 | 93.09 | 94.59 | 89.20 | 83.22 | 18.65 |
| SG_MS02  | 102.15 | 101.74 | 15.32 | 14.89 | 99.60 | 91.45 | 93.13 | 85.18 | 73.26 | 13.44 |
| SG_MS03  | 143.05 | 142.02 | 21.46 | 20.74 | 99.27 | 92.58 | 94.37 | 88.48 | 82.50 | 18.72 |
| SG_MS04  | 168.08 | 167.47 | 25.21 | 24.36 | 99.63 | 93.40 | 93.10 | 88.24 | 83.76 | 21.98 |
| SG_MS05  | 120.10 | 119.63 | 18.01 | 17.47 | 99.61 | 91.77 | 93.14 | 86.57 | 78.46 | 15.77 |
| SG_MS06  | 134.66 | 134.26 | 20.20 | 19.67 | 99.70 | 93.21 | 94.14 | 88.55 | 81.98 | 17.75 |
| SG_MS07  | 127.50 | 127.10 | 19.12 | 18.58 | 99.69 | 92.77 | 92.81 | 86.51 | 79.61 | 16.77 |
| SG_MA08  | 103.53 | 103.25 | 15.53 | 15.26 | 99.73 | 95.48 | 96.39 | 90.63 | 77.22 | 13.78 |
| SG_MS09  | 146.05 | 145.52 | 21.91 | 21.28 | 99.63 | 92.82 | 95.03 | 88.29 | 82.63 | 19.21 |
| SG_MS10  | 113.51 | 95.77  | 17.03 | 13.70 | 84.37 | 77.34 | 92.71 | 82.46 | 64.92 | 12.36 |
| SG_MS11  | 165.51 | 160.83 | 24.83 | 23.30 | 97.17 | 91.26 | 93.87 | 88.63 | 83.59 | 21.03 |
| SG_MA12  | 113.87 | 101.38 | 17.08 | 14.80 | 89.03 | 83.64 | 95.79 | 89.06 | 72.75 | 13.36 |
| TEL_MA01 | 117.43 | 117.07 | 17.61 | 17.41 | 99.69 | 96.64 | 95.99 | 92.14 | 84.75 | 15.71 |
| TEL_MA02 | 155.78 | 155.39 | 23.37 | 23.10 | 99.75 | 96.57 | 96.44 | 93.71 | 90.10 | 20.85 |
| TEL_MA03 | 133.28 | 133.04 | 19.99 | 19.78 | 99.82 | 96.71 | 95.96 | 92.74 | 87.53 | 17.86 |
| TEL_MA04 | 148.44 | 148.08 | 22.27 | 22.02 | 99.76 | 96.60 | 96.35 | 93.52 | 89.48 | 19.87 |
| TEL_MA05 | 148.19 | 147.84 | 22.23 | 21.98 | 99.77 | 96.59 | 96.51 | 93.71 | 89.57 | 19.84 |
| TEL_MA06 | 119.87 | 119.54 | 17.98 | 17.77 | 99.72 | 96.52 | 96.09 | 92.34 | 85.11 | 16.04 |
| TEL_MA07 | 146.81 | 146.49 | 22.02 | 21.77 | 99.78 | 96.52 | 96.32 | 93.50 | 89.24 | 19.65 |
| TEL_MA08 | 167.03 | 166.70 | 25.05 | 24.77 | 99.80 | 96.79 | 96.08 | 93.64 | 90.64 | 22.36 |
| TEL_MA09 | 130.69 | 130.24 | 19.60 | 19.35 | 99.66 | 96.36 | 96.33 | 92.80 | 87.06 | 17.47 |
| TEL_MA10 | 129.37 | 129.10 | 19.41 | 19.14 | 99.80 | 95.90 | 96.40 | 92.92 | 86.54 | 17.28 |
| TEL_MA11 | 134.93 | 134.67 | 20.24 | 20.02 | 99.80 | 96.42 | 96.34 | 93.05 | 87.49 | 18.06 |
| TEL_MA12 | 132.71 | 132.40 | 19.91 | 19.68 | 99.76 | 96.57 | 96.10 | 92.80 | 87.42 | 17.76 |
| YD_MS01  | 114.83 | 114.45 | 17.22 | 16.83 | 99.68 | 93.45 | 95.73 | 90.15 | 80.60 | 15.19 |
| YD_MS02  | 121.50 | 121.16 | 18.23 | 17.83 | 99.71 | 93.60 | 95.85 | 91.09 | 82.61 | 16.09 |
| YD_MA03  | 135.42 | 134.97 | 20.31 | 19.79 | 99.66 | 92.22 | 94.85 | 89.56 | 83.06 | 17.86 |
| YD_MA04  | 133.64 | 133.27 | 20.05 | 19.61 | 99.72 | 93.56 | 95.81 | 91.33 | 84.62 | 17.70 |
| YD_MS05  | 144.06 | 143.76 | 21.61 | 21.36 | 99.79 | 96.57 | 96.25 | 93.22 | 88.76 | 19.28 |
| YD_MS06  | 140.65 | 140.39 | 21.10 | 20.85 | 99.81 | 96.59 | 96.06 | 92.90 | 88.28 | 18.82 |
| YD_MA07  | 166.27 | 165.76 | 24.94 | 24.43 | 99.69 | 93.37 | 96.27 | 92.81 | 88.61 | 22.05 |
| YD_MS08  | 150.65 | 150.29 | 22.60 | 22.25 | 99.76 | 94.81 | 96.61 | 93.55 | 88.72 | 20.08 |
| YD_MA09  | 159.45 | 159.00 | 23.92 | 23.43 | 99.72 | 93.21 | 96.06 | 92.45 | 87.95 | 21.15 |
| YD_MS10  | 184.81 | 184.42 | 27.72 | 27.41 | 99.79 | 96.34 | 96.74 | 94.57 | 92.07 | 24.74 |
| YD_MA11  | 167.21 | 166.70 | 25.08 | 24.56 | 99.70 | 93.08 | 95.92 | 92.24 | 88.20 | 22.16 |
| YD_MS12  | 145.68 | 145.40 | 21.85 | 21.60 | 99.81 | 96.46 | 96.22 | 93.30 | 88.90 | 19.50 |
| YNL_MA01 | 121.83 | 121.59 | 18.27 | 18.08 | 99.8  | 96.61 | 96.13 | 92.56 | 85.81 | 16.32 |
| YNL_MA02 | 102.09 | 101.91 | 15.31 | 15.16 | 99.82 | 96.68 | 96.15 | 91.41 | 79.76 | 13.68 |
| YNL_MA03 | 145.30 | 145.03 | 21.8  | 21.57 | 99.81 | 96.74 | 95.98 | 93.15 | 89.08 | 19.47 |
| YNL_MA04 | 132.74 | 132.50 | 19.91 | 19.70 | 99.82 | 96.68 | 95.98 | 92.77 | 87.61 | 17.78 |
| YNL_MA05 | 102.66 | 102.43 | 15.40 | 15.23 | 99.78 | 96.55 | 95.63 | 90.78 | 79.72 | 13.75 |
| YNL_MA06 | 127.89 | 127.65 | 19.18 | 18.98 | 99.81 | 96.61 | 96.07 | 92.76 | 87.01 | 17.13 |
| YNL_MA07 | 117.72 | 117.46 | 17.66 | 17.45 | 99.78 | 96.48 | 96.03 | 92.13 | 84.56 | 15.75 |
| YNL_MA08 | 139.78 | 139.50 | 20.97 | 20.75 | 99.80 | 96.44 | 95.94 | 92.96 | 88.47 | 18.73 |
| YNL_MA09 | 142.34 | 142.06 | 21.35 | 21.12 | 99.80 | 96.59 | 96.35 | 93.52 | 89.05 | 19.06 |
| YNL_MA10 | 127.85 | 127.59 | 19.18 | 18.98 | 99.80 | 96.44 | 96.12 | 92.78 | 86.88 | 17.13 |
| YNL_MA11 | 137.01 | 136.76 | 20.55 | 20.33 | 99.81 | 96.43 | 96.14 | 93.00 | 88.03 | 18.35 |
| YNL_MA12 | 137.99 | 137.72 | 20.70 | 20.47 | 99.80 | 96.26 | 96.05 | 92.96 | 88.03 | 18.48 |
| ZQ_MH01  | 103.00 | 101.18 | 15.45 | 14.55 | 98.23 | 85.36 | 89.84 | 79.83 | 68.59 | 13.14 |
| ZQ_MH02  | 129.03 | 128.41 | 19.35 | 18.48 | 99.52 | 88.15 | 90.35 | 81.93 | 74.72 | 16.68 |
| ZQ_MH03  | 127.06 | 126.12 | 19.06 | 18.15 | 99.26 | 87.35 | 90.19 | 81.74 | 74.51 | 16.38 |
| ZQ_MH04  | 123.10 | 122.34 | 18.47 | 17.61 | 99.38 | 87.39 | 90.20 | 81.55 | 73.81 | 15.89 |
| ZQ_MH05  | 129.96 | 129.00 | 19.49 | 18.57 | 99.26 | 87.28 | 90.29 | 81.99 | 74.96 | 16.76 |

|         |        |        |       |       |       |       |       |       |       |       |
|---------|--------|--------|-------|-------|-------|-------|-------|-------|-------|-------|
| ZQ_MH06 | 125.11 | 124.52 | 18.77 | 17.92 | 99.53 | 88.04 | 90.52 | 81.87 | 74.16 | 16.17 |
| ZQ_MH07 | 111.14 | 110.58 | 16.67 | 15.92 | 99.49 | 87.26 | 90.06 | 80.64 | 71.18 | 14.37 |
| ZQ_MH08 | 136.40 | 135.77 | 20.46 | 19.55 | 99.54 | 87.70 | 90.51 | 82.51 | 76.00 | 17.65 |
| ZQ_MH09 | 115.61 | 115.08 | 17.34 | 16.58 | 99.54 | 87.46 | 90.77 | 81.14 | 72.55 | 14.96 |
| ZQ_MH10 | 132.11 | 131.48 | 19.82 | 18.93 | 99.52 | 87.69 | 91.11 | 82.46 | 75.40 | 17.09 |
| ZQ_MH11 | 112.42 | 111.88 | 16.86 | 16.11 | 99.52 | 87.59 | 90.55 | 80.85 | 71.62 | 14.54 |
| ZQ_MH12 | 114.17 | 113.62 | 17.12 | 16.37 | 99.52 | 87.39 | 90.94 | 81.08 | 72.17 | 14.77 |

Table S2. Primers of the described sequences.

| Genes           | Forward primers            | Reversed primers             |
|-----------------|----------------------------|------------------------------|
| <i>Aldh3a2</i>  | 5' GTGGAGTTGGTAATAGTGGG 3' | 5' GTTTGAGGATGAAAAAGCGT 3'   |
| <i>Acsc3</i>    | 5' AAAACTTCCTCTGCCTCCCG 3' | 5' TACAAAAAGCCCTCCTCGTC 3'   |
| <i>Hadhb</i>    | 5' AAAGTGCCAGGGAAGGATAT 3' | 5' CACCGTCAGTCAGGAAAGAG 3'   |
| <i>Cyp46a1</i>  | 5' ACCCATTTTTTAGGCTTTTT 3' | 5' CTCGTCCTCTGCTGTTCTG 3'    |
| <i>Gbe1</i>     | 5' CAACAGAAGGAGAGGGGAGG 3' | 5' CCTCCCAGACTGTGAGTGAG 3'   |
| <i>β-actin</i>  | 5' ACCCACACCGTGCCCATCTA 3' | 5' CGGACAATTTCTCTTTCGGCTG 3' |
| <i>Gapdh</i>    | 5' GGGAAACTGTGGAGGGATGG 3' | 5' ACCGGTAAGCTTGCCATTGA 3'   |
| <i>18S rRNA</i> | 5' ACACGGAGAGGTAGTGACGA 3' | 5' CCCGAGATCCAACACTACGAGC 3' |

Table S3. Comparison of stability of reference genes.

| Method                            | Ranking Order (Better--Good--Average) |         |          |
|-----------------------------------|---------------------------------------|---------|----------|
|                                   | 1                                     | 2       | 3        |
| Delta CT                          | β-actin                               | Gapdh   | 18S rRNA |
| BestKeeper                        | Gapdh                                 | β-actin | 18S rRNA |
| Normfinder                        | β-actin                               | Gapdh   | 18S rRNA |
| Genorm                            | Gapdh   β-actin                       |         | 18S rRNA |
| Recommended comprehensive ranking | β-actin                               | Gapdh   | 18S rRNA |

Table S4. The distribution and number of samples in this study.

| Samples                | Geographic position                        | Longitude and latitude | Number |
|------------------------|--------------------------------------------|------------------------|--------|
| <i>M. amblycephala</i> | Liangzi Lake, Hubei Province (LZL)         | 114.51, 30.23          | 12     |
|                        | Poyang Lake, Jiangxi Province (PYL)        | 115.80, 28.42          | 12     |
|                        | Yuni Lake, Hubei Province (YNL)            | 112.11, 29.79          | 12     |
|                        | Dongting Lake, Hunan Province (DTL)        | 112.44, 28.82          | 11     |
|                        | Tiane Island, Hubei Province (TEL)         | 112.57, 29.84          | 12     |
|                        | Jinsha River Reservoir, Hongan County (JS) | 114.62, 31.33          | 1      |
|                        | Beijing River, Shaoguan City (SG)          | 113.59, 24.79          | 2      |
|                        | Beijing River, Yingde City (YD)            | 113.37, 24.06          | 7      |
|                        | Jinsha River Reservoir, Hongan County (JS) | 114.62, 31.33          | 11     |
| <i>M. skolkovii</i>    | Qiantang River, Zhejiang Province (QT)     | 120.18, 30.21          | 12     |
|                        | Fuyuan, Heilongjiang Province (FY)         | 134.30, 48.36          | 12     |
|                        | Dongting Lake, Hunan Province (DTL)        | 112.44, 28.82          | 1      |
|                        | Beijing River, Shaoguan City (SG)          | 113.59, 24.79          | 10     |
|                        | Beijing River, Yingde City (YD)            | 113.37, 24.06          | 5      |
|                        | Xijiang River, Zhaoqing City (ZQ)          | 112.48, 23.08          | 12     |
| <i>M. hoffmanni</i>    | Xijiang River, Fengkai City (FK)           | 111.51, 23.47          | 12     |
|                        | Beijing River, Qingyuan City (QY)          | 113.13, 23.68          | 12     |
|                        | Wanquan River, Hainan Island (HN)          | 110.47, 19.25          | 12     |
|                        | Longxi River, Sichuan Province (LX)        | 105.49, 28.94          | 1      |

Table S5. Data information of genome resequencing.

| Sample ID | Raw Reads | Raw bases | Raw GC (%) | Raw Q20(%) | Raw Q30(%) | Clean Reads | Clean bases | Clean GC (%) | Clean Q20(%) | Clean Q30(%) |
|-----------|-----------|-----------|------------|------------|------------|-------------|-------------|--------------|--------------|--------------|
| DTL_MA01  | 1.36E+08  | 2.04E+10  | 38.41      | 95.32      | 85.53      | 1.17E+08    | 1.76E+10    | 38.16        | 97.35        | 89.44        |
| DTL_MA02  | 1.49E+08  | 2.24E+10  | 38.30      | 95.86      | 86.84      | 1.32E+08    | 1.98E+10    | 38.05        | 97.57        | 90.18        |
| DTL_MA03  | 1.72E+08  | 2.58E+10  | 38.50      | 96.32      | 88.06      | 1.54E+08    | 2.31E+10    | 38.27        | 97.82        | 90.98        |
| DTL_MA04  | 1.52E+08  | 2.28E+10  | 38.46      | 95.82      | 86.79      | 1.34E+08    | 2E+10       | 38.23        | 97.57        | 90.17        |
| DTL_MA05  | 1.7E+08   | 2.54E+10  | 38.37      | 96.22      | 87.83      | 1.52E+08    | 2.27E+10    | 38.17        | 97.78        | 90.85        |
| DTL_MA06  | 1.65E+08  | 2.47E+10  | 38.30      | 96.51      | 88.42      | 1.48E+08    | 2.22E+10    | 38.11        | 97.94        | 91.22        |
| DTL_MA07  | 1.53E+08  | 2.29E+10  | 38.75      | 96.25      | 87.75      | 1.37E+08    | 2.05E+10    | 38.53        | 97.79        | 90.77        |
| DTL_MA08  | 1.62E+08  | 2.43E+10  | 38.46      | 96.26      | 87.73      | 1.45E+08    | 2.18E+10    | 38.28        | 97.79        | 90.73        |
| DTL_MA09  | 1.36E+08  | 2.04E+10  | 38.51      | 95.79      | 86.50      | 1.19E+08    | 1.79E+10    | 38.29        | 97.58        | 90.01        |
| DTL_MA10  | 1.77E+08  | 2.66E+10  | 38.38      | 96.56      | 88.54      | 1.6E+08     | 2.4E+10     | 38.17        | 97.93        | 91.23        |
| DTL_MS11  | 1.58E+08  | 2.37E+10  | 38.31      | 96.23      | 87.66      | 1.41E+08    | 2.12E+10    | 38.13        | 97.79        | 90.73        |
| DTL_MA12  | 1.58E+08  | 2.37E+10  | 38.21      | 96.15      | 87.62      | 1.39E+08    | 2.08E+10    | 37.88        | 97.78        | 90.77        |
| FK_MH01   | 1.52E+08  | 2.28E+10  | 38.47      | 94.84      | 85.14      | 1.24E+08    | 1.86E+10    | 38.14        | 97.13        | 89.32        |
| FK_MH02   | 1.55E+08  | 2.32E+10  | 38.42      | 94.55      | 84.40      | 1.27E+08    | 1.91E+10    | 38.04        | 96.94        | 88.86        |
| FK_MH03   | 1.33E+08  | 2E+10     | 38.35      | 94.06      | 83.30      | 1.06E+08    | 1.6E+10     | 37.97        | 96.75        | 88.29        |
| FK_MH04   | 1.58E+08  | 2.37E+10  | 38.32      | 95.09      | 85.63      | 1.33E+08    | 1.99E+10    | 37.96        | 97.17        | 89.51        |
| FK_MH05   | 1.49E+08  | 2.24E+10  | 38.35      | 94.74      | 84.83      | 1.24E+08    | 1.85E+10    | 38.00        | 97.04        | 89.14        |
| FK_MH06   | 1.31E+08  | 1.96E+10  | 38.59      | 93.43      | 81.91      | 1.01E+08    | 1.52E+10    | 38.23        | 96.51        | 87.62        |
| FK_MH07   | 1.58E+08  | 2.37E+10  | 38.61      | 94.49      | 84.23      | 1.3E+08     | 1.94E+10    | 38.29        | 96.91        | 88.76        |
| FK_MH08   | 1.49E+08  | 2.24E+10  | 38.23      | 94.73      | 84.80      | 1.24E+08    | 1.86E+10    | 37.95        | 97.05        | 89.17        |
| FK_MH09   | 1.53E+08  | 2.3E+10   | 38.36      | 94.73      | 84.77      | 1.28E+08    | 1.92E+10    | 38.05        | 97.03        | 89.09        |
| FK_MH10   | 1.75E+08  | 2.62E+10  | 38.73      | 95.13      | 85.73      | 1.47E+08    | 2.2E+10     | 38.40        | 97.21        | 89.65        |
| FK_MH11   | 1.39E+08  | 2.09E+10  | 38.25      | 94.06      | 83.30      | 1.12E+08    | 1.68E+10    | 37.95        | 96.78        | 88.38        |
| FK_MH12   | 1.85E+08  | 2.77E+10  | 38.35      | 95.32      | 86.20      | 1.57E+08    | 2.36E+10    | 38.07        | 97.32        | 89.97        |
| FY_MS01   | 1.32E+08  | 1.99E+10  | 38.36      | 96.09      | 87.11      | 1.17E+08    | 1.75E+10    | 38.08        | 97.73        | 90.27        |
| FY_MS02   | 1.41E+08  | 2.12E+10  | 38.54      | 95.46      | 85.79      | 1.21E+08    | 1.82E+10    | 38.22        | 97.43        | 89.58        |
| FY_MS03   | 1.53E+08  | 2.29E+10  | 38.61      | 95.90      | 86.96      | 1.32E+08    | 1.99E+10    | 38.33        | 97.67        | 90.37        |
| FY_MS04   | 1.46E+08  | 2.19E+10  | 38.49      | 95.65      | 86.34      | 1.26E+08    | 1.89E+10    | 38.22        | 97.56        | 90.02        |
| FY_MS05   | 1.57E+08  | 2.36E+10  | 38.28      | 95.99      | 87.16      | 1.39E+08    | 2.08E+10    | 38.04        | 97.71        | 90.49        |
| FY_MS06   | 1.69E+08  | 2.54E+10  | 38.33      | 96.14      | 87.56      | 1.48E+08    | 2.22E+10    | 38.05        | 97.79        | 90.75        |
| FY_MS07   | 1.6E+08   | 2.4E+10   | 38.30      | 95.92      | 86.99      | 1.41E+08    | 2.11E+10    | 38.06        | 97.67        | 90.38        |
| FY_MS08   | 1.67E+08  | 2.5E+10   | 38.28      | 97.34      | 90.28      | 1.55E+08    | 2.32E+10    | 38.09        | 98.41        | 92.47        |
| FY_MS09   | 1.66E+08  | 2.49E+10  | 38.03      | 97.32      | 90.17      | 1.52E+08    | 2.28E+10    | 37.76        | 98.39        | 92.36        |
| FY_MS10   | 1.66E+08  | 2.5E+10   | 38.16      | 97.42      | 90.51      | 1.54E+08    | 2.32E+10    | 37.93        | 98.43        | 92.60        |
| FY_MS11   | 1.6E+08   | 2.4E+10   | 38.31      | 97.12      | 89.60      | 1.47E+08    | 2.21E+10    | 38.08        | 98.29        | 92.01        |
| FY_MS12   | 1.3E+08   | 1.95E+10  | 38.22      | 96.71      | 88.41      | 1.18E+08    | 1.77E+10    | 37.96        | 98.09        | 91.21        |
| HN_MH01   | 1.66E+08  | 2.48E+10  | 38.30      | 96.20      | 87.69      | 1.46E+08    | 2.19E+10    | 38.00        | 97.79        | 90.75        |
| HN_MH02   | 1.62E+08  | 2.43E+10  | 38.08      | 94.57      | 84.64      | 1.32E+08    | 1.98E+10    | 37.82        | 97.00        | 89.12        |
| HN_MH03   | 1.44E+08  | 2.16E+10  | 38.26      | 94.76      | 85.06      | 1.19E+08    | 1.79E+10    | 37.97        | 97.08        | 89.35        |
| HN_MH04   | 1.49E+08  | 2.24E+10  | 38.24      | 94.83      | 85.22      | 1.24E+08    | 1.85E+10    | 37.93        | 97.08        | 89.37        |
| HN_MH05   | 1.57E+08  | 2.35E+10  | 38.12      | 94.56      | 84.60      | 1.28E+08    | 1.93E+10    | 37.86        | 97.00        | 89.12        |
| HN_MH06   | 1.44E+08  | 2.16E+10  | 38.33      | 94.37      | 84.18      | 1.17E+08    | 1.75E+10    | 38.05        | 96.93        | 88.91        |
| HN_MH07   | 1.61E+08  | 2.42E+10  | 38.22      | 94.76      | 85.02      | 1.34E+08    | 2.01E+10    | 37.94        | 97.04        | 89.26        |
| HN_MH08   | 1.5E+08   | 2.26E+10  | 38.36      | 94.68      | 84.86      | 1.24E+08    | 1.86E+10    | 38.08        | 97.03        | 89.24        |
| HN_MH09   | 1.59E+08  | 2.39E+10  | 38.69      | 94.64      | 84.78      | 1.32E+08    | 1.98E+10    | 38.43        | 96.99        | 89.16        |
| HN_MH10   | 1.53E+08  | 2.29E+10  | 38.71      | 94.75      | 85.01      | 1.27E+08    | 1.9E+10     | 38.44        | 97.05        | 89.30        |
| HN_MH11   | 1.24E+08  | 1.86E+10  | 38.09      | 93.82      | 82.95      | 1.09E+08    | 1.63E+10    | 37.93        | 95.77        | 86.28        |
| HN_MH12   | 1.68E+08  | 2.52E+10  | 38.21      | 95.21      | 86.09      | 1.43E+08    | 2.14E+10    | 37.95        | 97.25        | 89.91        |
| JS_MS01   | 1.29E+08  | 1.93E+10  | 38.51      | 95.44      | 85.04      | 1.11E+08    | 1.66E+10    | 38.11        | 97.31        | 88.60        |
| JS_MS02   | 1.6E+08   | 2.39E+10  | 38.58      | 95.34      | 85.82      | 1.37E+08    | 2.05E+10    | 38.10        | 97.39        | 89.70        |
| JS_MS03   | 1.63E+08  | 2.44E+10  | 38.32      | 95.00      | 84.97      | 1.37E+08    | 2.05E+10    | 37.85        | 97.25        | 89.21        |
| JS_MS04   | 1.6E+08   | 2.39E+10  | 38.50      | 95.33      | 85.81      | 1.37E+08    | 2.05E+10    | 38.03        | 97.41        | 89.73        |
| JS_MS05   | 1.45E+08  | 2.17E+10  | 38.09      | 95.29      | 85.62      | 1.24E+08    | 1.86E+10    | 37.64        | 97.33        | 89.48        |
| JS_MS06   | 1.63E+08  | 2.45E+10  | 38.53      | 95.47      | 86.15      | 1.41E+08    | 2.11E+10    | 38.05        | 97.46        | 89.90        |
| JS_MS07   | 1.49E+08  | 2.24E+10  | 38.30      | 94.90      | 84.75      | 1.25E+08    | 1.88E+10    | 37.81        | 97.20        | 89.08        |

|          |          |          |       |       |       |          |          |       |       |       |
|----------|----------|----------|-------|-------|-------|----------|----------|-------|-------|-------|
| JS_MS08  | 1.67E+08 | 2.51E+10 | 38.52 | 94.83 | 85.05 | 1.39E+08 | 2.09E+10 | 38.05 | 97.04 | 89.14 |
| JS_MA09  | 2.24E+08 | 3.36E+10 | 38.88 | 95.00 | 85.85 | 1.65E+08 | 2.47E+10 | 38.37 | 97.38 | 90.79 |
| JS_MS10  | 1.35E+08 | 2.03E+10 | 39.01 | 94.59 | 84.57 | 1.11E+08 | 1.67E+10 | 38.46 | 97.01 | 88.96 |
| JS_MS11  | 1.43E+08 | 2.15E+10 | 38.57 | 94.76 | 84.95 | 1.19E+08 | 1.79E+10 | 38.07 | 97.07 | 89.14 |
| JS_MS12  | 1.6E+08  | 2.4E+10  | 38.61 | 96.04 | 87.27 | 1.4E+08  | 2.1E+10  | 38.34 | 97.68 | 90.43 |
| LX_MP01  | 1.42E+08 | 2.13E+10 | 38.31 | 96.32 | 87.73 | 1.27E+08 | 1.9E+10  | 38.05 | 97.93 | 90.87 |
| LX_MP02  | 1.36E+08 | 2.04E+10 | 38.31 | 95.40 | 86.08 | 1.16E+08 | 1.74E+10 | 37.83 | 97.36 | 89.71 |
| LX_MP03  | 1.28E+08 | 1.92E+10 | 38.33 | 95.21 | 85.57 | 1.08E+08 | 1.63E+10 | 37.91 | 97.34 | 89.51 |
| LX_MP04  | 1.27E+08 | 1.9E+10  | 38.46 | 94.74 | 84.40 | 1.05E+08 | 1.58E+10 | 38.01 | 97.10 | 88.76 |
| LX_MP05  | 1.16E+08 | 1.74E+10 | 38.39 | 95.17 | 85.55 | 1.06E+08 | 1.59E+10 | 38.10 | 96.53 | 87.84 |
| LX_MP06  | 1.28E+08 | 1.91E+10 | 38.27 | 94.49 | 84.32 | 1.05E+08 | 1.57E+10 | 37.75 | 96.97 | 88.82 |
| LX_MP07  | 1.25E+08 | 1.87E+10 | 38.51 | 94.72 | 84.88 | 1.04E+08 | 1.55E+10 | 37.98 | 97.07 | 89.13 |
| LX_MP08  | 1.4E+08  | 2.09E+10 | 38.77 | 94.61 | 84.60 | 1.16E+08 | 1.74E+10 | 38.25 | 96.99 | 88.93 |
| LX_MP09  | 1.37E+08 | 2.05E+10 | 38.41 | 94.71 | 84.80 | 1.14E+08 | 1.7E+10  | 37.90 | 97.04 | 89.03 |
| LX_MP10  | 1.42E+08 | 2.14E+10 | 38.78 | 94.56 | 84.43 | 1.17E+08 | 1.76E+10 | 38.36 | 96.98 | 88.79 |
| LX_MP11  | 1.46E+08 | 2.18E+10 | 38.61 | 95.05 | 85.51 | 1.23E+08 | 1.84E+10 | 38.20 | 97.15 | 89.34 |
| LX_MP12  | 1.66E+08 | 2.49E+10 | 38.46 | 95.14 | 85.77 | 1.42E+08 | 2.12E+10 | 38.11 | 97.23 | 89.56 |
| LZL_MA01 | 1.57E+08 | 2.35E+10 | 37.93 | 95.84 | 86.83 | 1.38E+08 | 2.08E+10 | 37.65 | 97.63 | 90.29 |
| LZL_MA02 | 1.49E+08 | 2.23E+10 | 37.89 | 95.68 | 86.45 | 1.3E+08  | 1.95E+10 | 37.62 | 97.58 | 90.09 |
| LZL_MA03 | 1.73E+08 | 2.6E+10  | 37.98 | 96.01 | 87.33 | 1.54E+08 | 2.3E+10  | 37.71 | 97.72 | 90.63 |
| LZL_MA04 | 1.65E+08 | 2.47E+10 | 37.93 | 96.14 | 87.62 | 1.47E+08 | 2.2E+10  | 37.71 | 97.76 | 90.76 |
| LZL_MA05 | 1.52E+08 | 2.28E+10 | 37.74 | 95.99 | 87.22 | 1.35E+08 | 2.02E+10 | 37.51 | 97.68 | 90.50 |
| LZL_MA06 | 1.78E+08 | 2.67E+10 | 38.00 | 96.42 | 88.32 | 1.6E+08  | 2.4E+10  | 37.76 | 97.88 | 91.17 |
| LZL_MA07 | 1.38E+08 | 2.07E+10 | 38.04 | 95.04 | 84.83 | 1.17E+08 | 1.76E+10 | 37.75 | 97.23 | 89.02 |
| LZL_MA08 | 1.77E+08 | 2.65E+10 | 38.15 | 96.37 | 88.16 | 1.57E+08 | 2.36E+10 | 37.88 | 97.85 | 91.04 |
| LZL_MA09 | 1.46E+08 | 2.19E+10 | 37.89 | 95.80 | 86.74 | 1.28E+08 | 1.93E+10 | 37.66 | 97.59 | 90.21 |
| LZL_MA10 | 1.24E+08 | 1.86E+10 | 38.11 | 95.03 | 84.25 | 1.06E+08 | 1.59E+10 | 37.82 | 97.16 | 88.34 |
| LZL_MA11 | 1.49E+08 | 2.24E+10 | 38.03 | 95.78 | 86.19 | 1.32E+08 | 1.97E+10 | 37.79 | 97.52 | 89.57 |
| LZL_MA12 | 1.2E+08  | 1.8E+10  | 37.75 | 95.29 | 84.92 | 1.04E+08 | 1.56E+10 | 37.50 | 97.28 | 88.75 |
| PYL_MA01 | 1.14E+08 | 1.71E+10 | 38.05 | 95.52 | 85.23 | 1.06E+08 | 1.59E+10 | 37.83 | 96.67 | 87.22 |
| PYL_MA02 | 1.22E+08 | 1.83E+10 | 38.45 | 94.90 | 83.74 | 1.03E+08 | 1.54E+10 | 38.08 | 97.05 | 87.86 |
| PYL_MA03 | 1.16E+08 | 1.74E+10 | 37.93 | 95.34 | 84.78 | 1E+08    | 1.51E+10 | 37.57 | 97.22 | 88.40 |
| PYL_MA04 | 1.14E+08 | 1.71E+10 | 38.20 | 95.17 | 84.40 | 1.05E+08 | 1.57E+10 | 37.96 | 96.49 | 86.68 |
| PYL_MA05 | 1.26E+08 | 1.89E+10 | 38.07 | 95.32 | 84.57 | 1.09E+08 | 1.64E+10 | 37.70 | 97.18 | 88.13 |
| PYL_MA06 | 1.24E+08 | 1.85E+10 | 38.05 | 95.26 | 84.48 | 1.06E+08 | 1.59E+10 | 37.70 | 97.19 | 88.14 |
| PYL_MA07 | 1.53E+08 | 2.3E+10  | 38.34 | 95.22 | 85.65 | 1.31E+08 | 1.96E+10 | 37.89 | 97.31 | 89.51 |
| PYL_MA08 | 1.69E+08 | 2.53E+10 | 38.64 | 95.58 | 86.55 | 1.45E+08 | 2.18E+10 | 38.21 | 97.50 | 90.13 |
| PYL_MA09 | 1.61E+08 | 2.41E+10 | 38.98 | 95.41 | 86.24 | 1.38E+08 | 2.07E+10 | 38.54 | 97.46 | 90.00 |
| PYL_MA10 | 1.46E+08 | 2.19E+10 | 38.68 | 95.51 | 86.41 | 1.26E+08 | 1.89E+10 | 38.23 | 97.48 | 90.05 |
| PYL_MA11 | 1.19E+08 | 1.79E+10 | 38.70 | 94.65 | 84.40 | 1.07E+08 | 1.61E+10 | 38.38 | 96.32 | 87.20 |
| PYL_MA12 | 1.49E+08 | 2.23E+10 | 38.27 | 95.38 | 86.12 | 1.27E+08 | 1.91E+10 | 37.82 | 97.44 | 89.92 |
| QT_MS01  | 1.5E+08  | 2.25E+10 | 38.68 | 95.26 | 86.01 | 1.28E+08 | 1.92E+10 | 38.30 | 97.28 | 89.69 |
| QT_MS02  | 1.39E+08 | 2.09E+10 | 38.50 | 94.87 | 85.12 | 1.17E+08 | 1.75E+10 | 38.12 | 97.10 | 89.16 |
| QT_MS03  | 1.4E+08  | 2.1E+10  | 38.39 | 94.48 | 84.23 | 1.15E+08 | 1.72E+10 | 37.98 | 96.94 | 88.69 |
| QT_MS04  | 1.35E+08 | 2.03E+10 | 38.42 | 95.32 | 85.90 | 1.15E+08 | 1.73E+10 | 37.96 | 97.39 | 89.76 |
| QT_MS05  | 1.68E+08 | 2.52E+10 | 38.21 | 95.68 | 86.73 | 1.46E+08 | 2.19E+10 | 37.78 | 97.51 | 90.16 |
| QT_MS06  | 1.19E+08 | 1.79E+10 | 38.65 | 94.39 | 83.73 | 1.07E+08 | 1.6E+10  | 38.31 | 96.16 | 86.73 |
| QT_MS07  | 1.45E+08 | 2.17E+10 | 38.62 | 95.20 | 85.64 | 1.23E+08 | 1.85E+10 | 38.16 | 97.35 | 89.65 |
| QT_MS08  | 1.36E+08 | 2.04E+10 | 38.93 | 95.10 | 85.41 | 1.15E+08 | 1.73E+10 | 38.47 | 97.32 | 89.54 |
| QT_MS09  | 1.35E+08 | 2.03E+10 | 39.04 | 95.15 | 85.54 | 1.15E+08 | 1.72E+10 | 38.57 | 97.34 | 89.61 |
| QT_MS10  | 1.45E+08 | 2.18E+10 | 39.36 | 95.48 | 86.37 | 1.25E+08 | 1.87E+10 | 38.84 | 97.43 | 89.96 |
| QT_MS11  | 1.29E+08 | 1.94E+10 | 38.57 | 94.38 | 83.68 | 1.06E+08 | 1.59E+10 | 38.03 | 96.98 | 88.44 |
| QT_MS12  | 1.53E+08 | 2.3E+10  | 38.37 | 95.56 | 86.48 | 1.32E+08 | 1.98E+10 | 37.91 | 97.47 | 90.01 |
| QY_MH01  | 1.4E+08  | 2.1E+10  | 38.34 | 94.42 | 84.13 | 1.14E+08 | 1.72E+10 | 37.87 | 96.85 | 88.55 |
| QY_MH02  | 1.32E+08 | 1.99E+10 | 38.36 | 93.94 | 83.09 | 1.05E+08 | 1.58E+10 | 37.84 | 96.65 | 88.02 |
| QY_MH03  | 1.3E+08  | 1.95E+10 | 38.11 | 94.10 | 83.38 | 1.05E+08 | 1.57E+10 | 37.64 | 96.69 | 88.11 |
| QY_MH04  | 1.56E+08 | 2.34E+10 | 38.29 | 94.31 | 83.92 | 1.27E+08 | 1.91E+10 | 37.82 | 96.81 | 88.49 |
| QY_MH05  | 1.43E+08 | 2.15E+10 | 38.54 | 94.30 | 83.82 | 1.17E+08 | 1.75E+10 | 38.03 | 96.76 | 88.33 |
| QY_MH06  | 1.57E+08 | 2.36E+10 | 38.30 | 95.32 | 86.00 | 1.34E+08 | 2.01E+10 | 37.90 | 97.38 | 89.80 |
| QY_MH07  | 1.37E+08 | 2.06E+10 | 38.40 | 94.95 | 85.08 | 1.15E+08 | 1.73E+10 | 37.97 | 97.21 | 89.25 |
| QY_MH08  | 1.39E+08 | 2.09E+10 | 38.41 | 94.88 | 85.00 | 1.16E+08 | 1.75E+10 | 37.99 | 97.21 | 89.27 |
| QY_MH09  | 1.47E+08 | 2.2E+10  | 38.20 | 95.49 | 86.39 | 1.26E+08 | 1.89E+10 | 37.82 | 97.45 | 90.00 |

|          |          |          |       |       |       |          |          |       |       |       |
|----------|----------|----------|-------|-------|-------|----------|----------|-------|-------|-------|
| QY_MH10  | 1.45E+08 | 2.18E+10 | 38.36 | 95.47 | 86.32 | 1.25E+08 | 1.88E+10 | 37.97 | 97.42 | 89.92 |
| QY_MH11  | 1.27E+08 | 1.91E+10 | 38.30 | 94.63 | 84.27 | 1.05E+08 | 1.58E+10 | 37.81 | 97.06 | 88.73 |
| QY_MH12  | 1.46E+08 | 2.19E+10 | 38.24 | 95.93 | 86.97 | 1.29E+08 | 1.93E+10 | 38.02 | 97.65 | 90.27 |
| SG_MS01  | 1.73E+08 | 2.6E+10  | 38.64 | 95.64 | 86.74 | 1.42E+08 | 2.13E+10 | 37.96 | 97.50 | 90.13 |
| SG_MS02  | 1.23E+08 | 1.85E+10 | 38.59 | 94.76 | 84.54 | 1.02E+08 | 1.53E+10 | 38.04 | 97.12 | 88.88 |
| SG_MS03  | 1.69E+08 | 2.53E+10 | 38.55 | 96.18 | 87.42 | 1.43E+08 | 2.15E+10 | 38.10 | 97.75 | 90.39 |
| SG_MS04  | 2.06E+08 | 3.09E+10 | 38.91 | 96.95 | 89.53 | 1.68E+08 | 2.52E+10 | 38.21 | 98.14 | 91.75 |
| SG_MS05  | 1.4E+08  | 2.11E+10 | 38.34 | 95.83 | 86.39 | 1.2E+08  | 1.8E+10  | 37.96 | 97.52 | 89.62 |
| SG_MS06  | 1.54E+08 | 2.32E+10 | 38.33 | 96.27 | 87.65 | 1.35E+08 | 2.02E+10 | 37.96 | 97.82 | 90.63 |
| SG_MS07  | 1.45E+08 | 2.18E+10 | 38.29 | 96.21 | 87.47 | 1.27E+08 | 1.91E+10 | 37.98 | 97.79 | 90.54 |
| SG_MA08  | 1.23E+08 | 1.84E+10 | 38.39 | 95.33 | 85.19 | 1.04E+08 | 1.55E+10 | 38.01 | 97.36 | 89.10 |
| SG_MS09  | 1.67E+08 | 2.5E+10  | 38.49 | 96.42 | 88.07 | 1.46E+08 | 2.19E+10 | 38.11 | 97.91 | 90.93 |
| SG_MS10  | 1.32E+08 | 1.98E+10 | 37.86 | 95.60 | 87.17 | 1.14E+08 | 1.7E+10  | 37.39 | 96.99 | 89.68 |
| SG_MS11  | 2.05E+08 | 3.08E+10 | 38.64 | 96.90 | 89.54 | 1.66E+08 | 2.48E+10 | 37.92 | 98.16 | 91.84 |
| SG_MA12  | 1.35E+08 | 2.02E+10 | 37.96 | 95.37 | 86.71 | 1.14E+08 | 1.71E+10 | 37.42 | 96.93 | 89.52 |
| TEL_MA01 | 1.35E+08 | 2.02E+10 | 38.02 | 95.56 | 86.04 | 1.17E+08 | 1.76E+10 | 37.82 | 97.45 | 89.70 |
| TEL_MA02 | 1.74E+08 | 2.62E+10 | 38.22 | 96.24 | 87.80 | 1.56E+08 | 2.34E+10 | 38.03 | 97.79 | 90.82 |
| TEL_MA03 | 1.51E+08 | 2.26E+10 | 38.40 | 96.03 | 87.26 | 1.33E+08 | 2E+10    | 38.19 | 97.69 | 90.47 |
| TEL_MA04 | 1.66E+08 | 2.49E+10 | 38.53 | 96.28 | 87.93 | 1.48E+08 | 2.23E+10 | 38.32 | 97.81 | 90.90 |
| TEL_MA05 | 1.67E+08 | 2.51E+10 | 38.42 | 96.13 | 87.54 | 1.48E+08 | 2.22E+10 | 38.20 | 97.73 | 90.63 |
| TEL_MA06 | 1.39E+08 | 2.08E+10 | 38.49 | 95.53 | 85.96 | 1.2E+08  | 1.8E+10  | 38.25 | 97.45 | 89.67 |
| TEL_MA07 | 1.65E+08 | 2.47E+10 | 38.54 | 96.34 | 88.04 | 1.47E+08 | 2.2E+10  | 38.29 | 97.83 | 90.92 |
| TEL_MA08 | 1.87E+08 | 2.8E+10  | 38.54 | 96.53 | 88.56 | 1.67E+08 | 2.51E+10 | 38.27 | 97.92 | 91.25 |
| TEL_MA09 | 1.5E+08  | 2.25E+10 | 38.45 | 95.71 | 86.41 | 1.31E+08 | 1.96E+10 | 38.18 | 97.56 | 89.98 |
| TEL_MA10 | 1.46E+08 | 2.19E+10 | 38.27 | 96.16 | 87.57 | 1.29E+08 | 1.94E+10 | 38.04 | 97.75 | 90.65 |
| TEL_MA11 | 1.53E+08 | 2.29E+10 | 38.84 | 95.99 | 87.27 | 1.35E+08 | 2.02E+10 | 38.54 | 97.70 | 90.57 |
| TEL_MA12 | 1.53E+08 | 2.3E+10  | 38.52 | 95.70 | 86.48 | 1.33E+08 | 1.99E+10 | 38.19 | 97.57 | 90.08 |
| YD_MS01  | 1.4E+08  | 2.1E+10  | 38.23 | 94.44 | 84.13 | 1.15E+08 | 1.72E+10 | 37.95 | 96.93 | 88.81 |
| YD_MS02  | 1.46E+08 | 2.18E+10 | 38.09 | 94.72 | 84.83 | 1.22E+08 | 1.82E+10 | 37.84 | 97.03 | 89.16 |
| YD_MA03  | 1.62E+08 | 2.43E+10 | 38.30 | 94.84 | 85.12 | 1.35E+08 | 2.03E+10 | 38.05 | 97.09 | 89.34 |
| YD_MA04  | 1.57E+08 | 2.36E+10 | 37.91 | 95.14 | 85.77 | 1.34E+08 | 2E+10    | 37.70 | 97.20 | 89.65 |
| YD_MS05  | 1.7E+08  | 2.55E+10 | 38.47 | 95.06 | 85.63 | 1.44E+08 | 2.16E+10 | 38.21 | 97.17 | 89.58 |
| YD_MS06  | 1.66E+08 | 2.49E+10 | 38.44 | 95.18 | 85.92 | 1.41E+08 | 2.11E+10 | 38.18 | 97.25 | 89.80 |
| YD_MA07  | 1.82E+08 | 2.73E+10 | 38.32 | 96.87 | 89.25 | 1.66E+08 | 2.49E+10 | 38.09 | 98.16 | 91.79 |
| YD_MS08  | 1.65E+08 | 2.48E+10 | 38.42 | 96.79 | 89.01 | 1.51E+08 | 2.26E+10 | 38.20 | 98.14 | 91.66 |
| YD_MA09  | 1.72E+08 | 2.59E+10 | 38.15 | 97.17 | 90.03 | 1.59E+08 | 2.39E+10 | 37.93 | 98.31 | 92.32 |
| YD_MS10  | 1.98E+08 | 2.98E+10 | 38.26 | 97.41 | 90.80 | 1.85E+08 | 2.77E+10 | 38.05 | 98.44 | 92.84 |
| YD_MA11  | 1.8E+08  | 2.7E+10  | 38.05 | 97.24 | 90.25 | 1.67E+08 | 2.51E+10 | 37.84 | 98.34 | 92.46 |
| YD_MS12  | 1.63E+08 | 2.45E+10 | 38.69 | 96.22 | 87.80 | 1.46E+08 | 2.19E+10 | 38.46 | 97.76 | 90.80 |
| YNL_MA01 | 1.44E+08 | 2.16E+10 | 38.24 | 95.13 | 85.49 | 1.22E+08 | 1.83E+10 | 37.81 | 97.33 | 89.55 |
| YNL_MA02 | 1.21E+08 | 1.81E+10 | 38.54 | 95.06 | 85.22 | 1.02E+08 | 1.53E+10 | 38.14 | 97.28 | 89.34 |
| YNL_MA03 | 1.66E+08 | 2.5E+10  | 38.26 | 95.78 | 87.01 | 1.45E+08 | 2.18E+10 | 37.90 | 97.62 | 90.43 |
| YNL_MA04 | 1.54E+08 | 2.32E+10 | 38.35 | 95.39 | 86.06 | 1.33E+08 | 1.99E+10 | 37.97 | 97.43 | 89.85 |
| YNL_MA05 | 1.17E+08 | 1.75E+10 | 38.02 | 95.89 | 86.32 | 1.03E+08 | 1.54E+10 | 37.83 | 97.61 | 89.68 |
| YNL_MA06 | 1.49E+08 | 2.23E+10 | 38.40 | 95.46 | 86.24 | 1.28E+08 | 1.92E+10 | 38.02 | 97.48 | 89.99 |
| YNL_MA07 | 1.4E+08  | 2.09E+10 | 38.71 | 95.25 | 85.73 | 1.18E+08 | 1.77E+10 | 38.26 | 97.40 | 89.69 |
| YNL_MA08 | 1.58E+08 | 2.37E+10 | 38.22 | 96.10 | 87.47 | 1.4E+08  | 2.1E+10  | 37.98 | 97.76 | 90.66 |
| YNL_MA09 | 1.6E+08  | 2.4E+10  | 38.39 | 96.23 | 87.77 | 1.42E+08 | 2.14E+10 | 38.16 | 97.82 | 90.83 |
| YNL_MA10 | 1.45E+08 | 2.18E+10 | 38.41 | 95.82 | 86.72 | 1.28E+08 | 1.92E+10 | 38.18 | 97.62 | 90.20 |
| YNL_MA11 | 1.54E+08 | 2.31E+10 | 38.33 | 96.11 | 87.44 | 1.37E+08 | 2.06E+10 | 38.09 | 97.75 | 90.61 |
| YNL_MA12 | 1.56E+08 | 2.34E+10 | 38.57 | 96.04 | 87.30 | 1.38E+08 | 2.07E+10 | 38.33 | 97.74 | 90.58 |
| ZQ_MH01  | 1.32E+08 | 1.98E+10 | 38.18 | 93.67 | 82.60 | 1.03E+08 | 1.54E+10 | 37.94 | 96.62 | 88.04 |
| ZQ_MH02  | 1.59E+08 | 2.38E+10 | 38.55 | 94.69 | 84.85 | 1.29E+08 | 1.94E+10 | 38.21 | 96.98 | 89.08 |
| ZQ_MH03  | 1.54E+08 | 2.31E+10 | 38.12 | 94.72 | 84.94 | 1.27E+08 | 1.91E+10 | 37.85 | 97.01 | 89.19 |
| ZQ_MH04  | 1.51E+08 | 2.26E+10 | 38.46 | 94.63 | 84.69 | 1.23E+08 | 1.85E+10 | 38.10 | 96.94 | 88.96 |
| ZQ_MH05  | 1.57E+08 | 2.35E+10 | 38.38 | 94.81 | 85.12 | 1.3E+08  | 1.95E+10 | 38.09 | 97.04 | 89.27 |
| ZQ_MH06  | 1.54E+08 | 2.31E+10 | 38.54 | 94.65 | 84.79 | 1.25E+08 | 1.88E+10 | 38.18 | 96.97 | 89.07 |
| ZQ_MH07  | 1.38E+08 | 2.07E+10 | 38.48 | 94.33 | 84.07 | 1.11E+08 | 1.67E+10 | 38.20 | 96.87 | 88.75 |
| ZQ_MH08  | 1.65E+08 | 2.47E+10 | 38.39 | 94.95 | 85.42 | 1.36E+08 | 2.05E+10 | 38.11 | 97.20 | 89.55 |
| ZQ_MH09  | 1.4E+08  | 2.1E+10  | 38.20 | 94.70 | 84.82 | 1.16E+08 | 1.73E+10 | 37.97 | 97.07 | 89.18 |
| ZQ_MH10  | 1.59E+08 | 2.39E+10 | 38.60 | 94.92 | 85.34 | 1.32E+08 | 1.98E+10 | 38.31 | 97.15 | 89.44 |
| ZQ_MH11  | 1.37E+08 | 2.05E+10 | 38.44 | 94.79 | 85.03 | 1.12E+08 | 1.69E+10 | 38.15 | 97.10 | 89.27 |

|         |          |          |       |       |       |          |          |       |       |       |
|---------|----------|----------|-------|-------|-------|----------|----------|-------|-------|-------|
| ZQ_MH12 | 1.41E+08 | 2.12E+10 | 38.43 | 94.42 | 84.17 | 1.14E+08 | 1.71E+10 | 38.13 | 96.93 | 88.75 |
|---------|----------|----------|-------|-------|-------|----------|----------|-------|-------|-------|

**Table S6.** Variation information of samples in this study.

|                  | Total      | <i>M. amblycephala</i> | <i>M. hoffmanni</i> | <i>M. pellegrini</i> | <i>M. skolkovii</i> |
|------------------|------------|------------------------|---------------------|----------------------|---------------------|
| accession number | 180        | 69                     | 48                  | 12                   | 51                  |
| SUM              | 31,857,189 | 16,235,392             | 16,133,317          | 6,825,670            | 17,179,046          |
| Intergenic       | 17,662,510 | 9,096,237              | 8,883,853           | 3,865,100            | 9,717,098           |
| Intronic         | 13,067,222 | 6,531,879              | 6,625,127           | 2,700,354            | 6,837,535           |
| 3'UTR            | 89,504     | 43,219                 | 42,060              | 15,415               | 42,908              |
| 5'UTR            | 49,587     | 23,780                 | 23,851              | 8,967                | 23,853              |
| Nonsynonymous    | 452,201    | 258,010                | 271,477             | 119,976              | 273,031             |
| synonymous       | 481,078    | 254,026                | 258,221             | 104,844              | 256,836             |

**Table S7.** Candidate genes and enriched pathways in selective sweep analysis.

| Genes                                                                  | PiR value | XP-EHH value | Pathways                                                                                      |
|------------------------------------------------------------------------|-----------|--------------|-----------------------------------------------------------------------------------------------|
| Fatty aldehyde dehydrogenase ( <i>Aldh3a2</i> )                        | 2.57      | -1.91        | Valine, leucine and isoleucine degradation;<br>Glycolysis/gluconeogenesis; Phytol degradation |
| Long chain fatty acid-CoA ligase ( <i>Acsbg2</i> )                     | 1.72      | -1.64        | Fatty acid biosynthesis                                                                       |
| Protein kinase B ( <i>Akt2</i> )                                       | 1.46      | -1.71        | Insulin signaling pathway                                                                     |
| Glycogen branching enzyme ( <i>Gbe1</i> )                              | 2.30      | -2.38        | Starch and sucrose metabolism                                                                 |
| Mitochondrial tri-functional protein $\beta$ -subunit ( <i>Hadhb</i> ) | -2.11     | 1.18         | Glycolysis/gluconeogenesis; Fatty acid degradation                                            |
| Acyl-CoA synthetase short-chain 3 ( <i>Acss3</i> )                     | 1.89      | -2.01        | Phytol degradation                                                                            |
| Cholesterol 24-hydroxylase ( <i>Cyp46a1</i> )                          | 1.48      | -2.10        | Cholesterol metabolism                                                                        |
| Bile acid CoA: amino acid N-acyltransferase ( <i>Baat</i> )            | 1.12      | -2.09        | Cholesterol metabolism                                                                        |
| Umami Taste Receptor gene ( <i>Tas1r1</i> )                            | 0.30      | -1.32        | Sensory system                                                                                |
